# Supplementary material for: Using Health Extension Workers for Monitoring Child Mortality in Real-Time: Validation against Household Survey Data in Rural Ethiopia
Source: PubMed Central journal article supplement (PMC4659609; doi:10.1371/journal.pone.0126909), 2015-11-25
Supplement: pone.0126909.s002.pdf [file pone.0126909.s002.pdf]

## **S2 APPENDIX**

### **Appendices to RMM project report in Ethiopia**

#### **Appendix 2.1: Community-based (HEW) RMM method**

- Table 1.1. HEW reported births per month by gender and zone
- Table 1.2. Sex ratio at birth by zone
- Table 1.3. Number of under-5 deaths by month of death and zone
- Table 1.4. Number of infant deaths by month of death and zone
- Table 1.5. Number of neonatal deaths by month of death and zone
- Table 1.6. U5MR by month by zone and gender
- Table 1.7. Infant mortality rate by month by zone
- Table 1.8. Neonatal mortality rate by month by zone and gender
- Table 1.9. Age at death: 0-27 days
- Table 1.10. Age at death: 1-23 months
- Table 1.11. Age at death: 1-4 years

#### **Appendix 2.2: Brief summary of endline validation survey data quality assessment**

- Table 2.1. Endline survey response rates for Households and Eligible Women by Zone
- Table 2.2. Sex of the head of the household, number of under-five children and household size by zone
- Table 2.3. Percentage distribution of women aged 15-49 years by number of children ever born by zone
- Table 2.4. Reporting completeness of date of birth, age at death and child survival status by zone
- Table 2.5. Age and Sex distribution of the household population by zone
- Table 2.6. Number of births by survival status of child, year of birth, and zone
- Figure 2.1. Population age pyramid for Jimma and West Hararghe
- Figure 2.2. Distribution of females in sampled households by age and by zones
- Table 2.7. Percentage distribution of interviewed women 15-49 by selected demographic characteristics and zone
- Figure 2.3. Distribution of births by month and year of birth in West Hararghe zone
- Figure 2.4. Distribution of births by month and year of birth in Jimma zone
- Figure 2.5. Distribution of births by month and year of birth in both zones
- Table 2.8. Distribution of births by calendar month in Jimma zone
- Table 2.9. Distribution of births by calendar month in West Hararghe zone
- Table 2.10. Distribution of births by calendar month in both zones
- Figure 2.6. Sex Ratio at birth for births 2003-2012
- Table 2.11. Sex ratio at birth by year and zone
- Figure 2.7. Distribution of neonatal deaths by age at death in days (births 2003 – 2012)
- Figure 2.8. Distribution of children who died between ages of 1 month and 23 months by age at death in month (births 2003 – 2012)
- Table 2.12. Births in five years preceding past five years (2008-2012: Gregorian calendar): age at death 0-30 days
- Table 2.13. Births in five years preceding past five years (2008-2012: Gregorian calendar): age at death 0-23 months
- Table 2.14. Births in five years preceding past five years (2003-2007: Gregorian calendar): age at death 0-30 days
- Table 2.15. Births in five years preceding past five years (2003-2007: Gregorian calendar): age at death 0-23 months
- Table 2.16. Comparison of the ratio of early neonatal to neonatal deaths, neonatal to infant deaths, and infant to under-five deaths from the endline survey in Jimma and West Hararghe, January 2012 – March 2013

#### **Appendix 2.3: RMM community-based validation**

Table 3.1. Number of HEWs reporting by month and zone

**Appendix 2.4: RMM Ethiopia questionnaires and forms**

Form 4.1. Family Folder

Form 4.2. HEW Data Extraction Forms

Form 4.3. HEW Data Extraction Forms: English

Form 4.4. HEW Data Extraction Forms: Amharic

**Real Time MORTALITY MONITORING  
MONTHLY HEW RECORDING OF VITAL EVENTS DATA  
COLLECTION FORM**

JOHNS HOPKINS UNIVERSITY – MIZ HASAB RESEARCH CENTER

**መረጃ መሰብሰቢያ ቅጽ**

**Guca odeeffannoon ittiin sasaabamu**

|                             |                               |
|-----------------------------|-------------------------------|
| ዞን ..... ወረዳ .....          | የቀበሌ ወረዳ ስም .....             |
| Godina ..... Aanaa .....    | Maqaa gandaa .....            |
| የጤና ተቋም ስም .....            | የጤና ተቋም መለያ ቁጥር .....         |
| Maqaa dhaabata fayyaa ..... | Koodii dhaabbata fayyaa ..... |
| የጤና ኤክስፔንሽን ስም 1. ....      | ወር እና ዓ.ም. ....               |
| Maqaa hojjetu 2. ....       | Ji'aa fii bara .....          |
| ekisteenshinii fayyaa ..... |                               |

**ክፍል ሀ: እርግዝና**

**Kutaa A: Ulfa**

| ተ.ቁ<br>Lakk | የነፍስ ጡሯ የቤተሰብ መለያ ቁ. ከቤተሰብ ማህደር<br>Koodii maatii dubartii ulfaa galmmee maatii keessaa | የነፍስ ጡሯ መለያ ቁ. ከቤተሰብ ማህደር<br>Koodii dubartii ulfaa galmmee maatii keessaa | ዕድሜ<br>Umurii | የመጨረሻ የወር አበባ የታየበት ወር እና ዓ.ም.<br>Guyyaa dhumaa adafiin itti mul'ate yoomi? | አሁን የሰንት ወር ነፍስ ጡር ነሽ<br>Amma ulfa ji'a meeqati | *እርግዝና ወይንት<br>* Bu'aa ulfichaa | አስተያየት ካለ<br>Yaada (yoojiraate) |
|-------------|----------------------------------------------------------------------------------------|---------------------------------------------------------------------------|---------------|-----------------------------------------------------------------------------|-------------------------------------------------|---------------------------------|---------------------------------|
| (ሀ 01)      | (ሀ 02)                                                                                 | (ሀ 03)                                                                    | (ሀ 04)        | (ሀ 05)                                                                      | (ሀ 06)                                          | (ሀ 07)                          | (ሀ 08)                          |
| 01          |                                                                                        |                                                                           |               | -- / -- --                                                                  |                                                 |                                 |                                 |

\* እርግዝና ወይንት 1. እርግዝና ወይንት (Abortion) 2. የጨነገፈ (Miscarriage) 3. ሞተ ወይንት (Stillbirth) ከሆነ ይገለጽ::

\* Bu'aa ulfichaa 1. Ulfichi kan addaan cite 2. Kan irraa ba'e 3. Du'anii kan dhalatan yoota'e ibsi.

## Appendix 2.1: Community-based (HEW) RMM method

Table 1.1. HEW reported births per month by gender and zone

| Month      | MALE BIRTHS REPORTED BY MONTH |               |       | FEMALE BIRTHS REPORTED BY MONTH |               |       |
|------------|-------------------------------|---------------|-------|---------------------------------|---------------|-------|
|            | Jimma                         | West Hararghe | Total | Jimma                           | West Hararghe | Total |
| Jan_2012   | 60.6                          | 70.7          | 131.3 | 51.7                            | 63.2          | 114.9 |
| Feb_2012   | 74.8                          | 109.1         | 183.9 | 69.8                            | 81.4          | 151.1 |
| Mar_2012   | 90.7                          | 107.1         | 197.8 | 114.7                           | 108.7         | 223.4 |
| Apr_2012   | 123.9                         | 108.0         | 231.9 | 122.5                           | 94.3          | 216.8 |
| May_2012   | 122.6                         | 136.1         | 258.7 | 96.1                            | 140.6         | 236.7 |
| Jun_2012   | 107.9                         | 134.7         | 242.6 | 105.7                           | 150.3         | 256.0 |
| Jul_2012   | 89.2                          | 139.8         | 229.0 | 99.2                            | 153.3         | 252.5 |
| Aug_2012   | 87.3                          | 120.4         | 207.7 | 94.7                            | 118.3         | 213.0 |
| Sept_2012  | 82.5                          | 122.2         | 204.7 | 78.2                            | 112.0         | 190.2 |
| Oct_2012   | 105.4                         | 116.5         | 221.9 | 99.7                            | 113.6         | 213.3 |
| Nov_2012   | 87.9                          | 104.6         | 192.5 | 87.9                            | 99.8          | 187.7 |
| Dec_2012   | 85.3                          | 87.3          | 172.6 | 89.3                            | 118.6         | 208.0 |
| Jan_2013   | 106.9                         | 67.1          | 173.9 | 112.8                           | 66.1          | 178.9 |
| Feb_2013   | 78.1                          | 79.2          | 157.3 | 84.6                            | 63.6          | 148.1 |
| Mar_2013   | 77.1                          | 89.9          | 167.0 | 74.3                            | 95.2          | 169.5 |
| Don't Know | 3.1                           |               | 3.1   | 0.0                             | 0.5           | 0.5   |

Table 1.2. Sex ratio at birth by zone

| Month     | Zone  |               | Total |
|-----------|-------|---------------|-------|
|           | Jimma | West Hararghe |       |
| Jan_2012  | 117.2 | 111.8         | 114.2 |
| Feb_2012  | 107.2 | 134.1         | 121.7 |
| Mar_2012  | 79.1  | 98.5          | 88.5  |
| Apr_2012  | 101.2 | 114.5         | 107.0 |
| May_2012  | 127.6 | 96.8          | 109.3 |
| Jun_2012  | 102.1 | 89.6          | 94.8  |
| Jul_2012  | 89.9  | 91.2          | 90.7  |
| Aug_2012  | 92.1  | 101.8         | 97.5  |
| Sept_2012 | 105.5 | 109.1         | 107.6 |
| Oct_2012  | 105.8 | 102.6         | 104.1 |
| Nov_2012  | 100.0 | 104.9         | 102.6 |
| Dec_2012  | 95.5  | 73.6          | 83.0  |
| Jan_2013  | 94.7  | 101.5         | 97.2  |
| Feb_2013  | 92.3  | 124.6         | 106.2 |
| Mar_2013  | 103.8 | 94.5          | 98.5  |

Table 1.3. Number of under-5 deaths by month of death and zone

| Month     | Zone  |               | Total |
|-----------|-------|---------------|-------|
|           | Jimma | West Hararghe |       |
| Jan_2012  | 13.5  | 14.3          | 27.8  |
| Feb_2012  | 10.2  | 12.3          | 22.6  |
| Mar_2012  | 3.2   | 11.5          | 14.7  |
| Apr_2012  | 18.7  | 14.5          | 33.3  |
| May_2012  | 13.5  | 14.6          | 28.0  |
| Jun_2012  | 14.9  | 15.9          | 30.8  |
| Jul_2012  | 8.5   | 16.5          | 25.0  |
| Aug_2012  | 5.6   | 4.5           | 10.1  |
| Sept_2012 | 9.0   | 7.3           | 16.3  |
| Oct_2012  | 10.0  | 8.1           | 18.0  |
| Nov_2012  | 9.6   | 6.8           | 16.4  |
| Dec_2012  | 7.6   | 5.7           | 13.3  |
| Jan_2013  | 9.1   | 7.8           | 16.9  |
| Feb_2013  | 6.6   | 5.5           | 12.1  |
| Mar_2013  | 3.6   | 7.5           | 11.1  |
| Total     | 143.7 | 152.7         | 296.4 |

Table 1.4. Number of infant deaths by month of death and zone

| Month     | Zone  |               | Total |
|-----------|-------|---------------|-------|
|           | Jimma | West Hararghe |       |
| Jan_2012  | 9.3   | 10.6          | 19.9  |
| Feb_2012  | 8.0   | 9.8           | 17.7  |
| Mar_2012  | 1.0   | 11.5          | 12.5  |
| Apr_2012  | 13.0  | 13.3          | 26.3  |
| May_2012  | 9.7   | 12.5          | 22.2  |
| Jun_2012  | 10.0  | 12.1          | 22.1  |
| Jul_2012  | 5.6   | 9.1           | 14.7  |
| Aug_2012  | 3.9   | 3.9           | 7.9   |
| Sept_2012 | 9.0   | 5.1           | 14.2  |
| Oct_2012  | 7.3   | 6.8           | 14.2  |
| Nov_2012  | 7.8   | 4.9           | 12.7  |
| Dec_2012  | 5.9   | 5.7           | 11.6  |
| Jan_2013  | 6.7   | 4.5           | 11.1  |
| Feb_2013  | 6.6   | 5.5           | 12.1  |
| Mar_2013  | 3.6   | 7.0           | 10.7  |
| Total     | 107.5 | 122.3         | 229.8 |

Table 1.5. Number of neonatal deaths by month of death and zone

| Month     | Zone  |               | Total |
|-----------|-------|---------------|-------|
|           | Jimma | West Hararghe |       |
| Jan_2012  | 6.0   | 7.2           | 13.2  |
| Feb_2012  | 5.9   | 6.3           | 12.2  |
| Mar_2012  | 0.0   | 9.2           | 9.2   |
| Apr_2012  | 9.0   | 9.6           | 18.6  |
| May_2012  | 6.1   | 7.9           | 14.0  |
| Jun_2012  | 6.8   | 7.7           | 14.6  |
| Jul_2012  | 0.9   | 5.5           | 6.4   |
| Aug_2012  | 2.6   | 2.5           | 5.2   |
| Sept_2012 | 6.3   | 2.6           | 9.0   |
| Oct_2012  | 5.8   | 3.9           | 9.6   |
| Nov_2012  | 3.5   | 3.5           | 7.1   |
| Dec_2012  | 5.9   | 4.2           | 10.1  |
| Jan_2013  | 4.0   | 4.5           | 8.5   |
| Feb_2013  | 5.4   | 4.8           | 10.2  |
| Mar_2013  | 2.0   | 5.7           | 7.6   |
| Total     | 70.3  | 85.3          | 155.5 |

Table 1.6. U5MR by month by zone and gender

| Month     | MONTHLY UNDER-FIVE MORTALITY RATE |               |       | MALE MONTHLY UNDER-FIVE MORTALITY RATE |               |       | FEMALE MONTHLY UNDER-FIVE MORTALITY RATE |               |       |
|-----------|-----------------------------------|---------------|-------|----------------------------------------|---------------|-------|------------------------------------------|---------------|-------|
|           | Jimma                             | West Hararghe | Total | Jimma                                  | West Hararghe | Total | Jimma                                    | West Hararghe | Total |
| Jan_2012  | 120.1                             | 106.9         | 112.9 | 113.7                                  | 123.1         | 118.7 | 61.3                                     | 60.1          | 60.6  |
| Feb_2012  | 70.9                              | 64.8          | 67.4  | 89.2                                   | 44.4          | 62.6  | 56.7                                     | 36.8          | 46.0  |
| Mar_2012  | 15.6                              | 52.8          | 34.7  | 81.0                                   | 92.0          | 87.0  | 59.0                                     | 45.0          | 52.2  |
| Apr_2012  | 76.0                              | 71.7          | 74.0  | 29.3                                   | 75.1          | 50.6  | 47.5                                     | 43.9          | 45.9  |
| May_2012  | 60.9                              | 52.6          | 56.3  | 54.8                                   | 76.4          | 66.2  | 20.3                                     | 16.2          | 17.9  |
| Jun_2012  | 69.3                              | 55.5          | 61.4  | 72.8                                   | 72.1          | 72.4  | 31.4                                     | 33.7          | 32.7  |
| Jul_2012  | 45.0                              | 56.2          | 51.9  | 19.6                                   | 46.2          | 35.9  | 9.3                                      | 15.7          | 13.2  |
| Aug_2012  | 30.3                              | 19.0          | 23.9  | 49.1                                   | 13.9          | 28.7  | 5.1                                      | 26.6          | 17.0  |
| Sept_2012 | 56.3                              | 31.0          | 41.3  | 71.2                                   | 63.3          | 66.5  | 65.2                                     | 40.2          | 50.5  |
| Oct_2012  | 48.4                              | 34.9          | 41.3  | 104.9                                  | 67.1          | 85.1  | 60.7                                     | 38.5          | 48.9  |
| Nov_2012  | 54.2                              | 32.3          | 42.3  | 102.9                                  | 69.9          | 84.9  | 0.0                                      | 0.0           | 0.0   |
| Dec_2012  | 43.8                              | 27.1          | 34.7  | 101.4                                  | 41.7          | 71.2  | 35.4                                     | 31.1          | 32.9  |
| Jan_2013  | 41.1                              | 57.0          | 47.2  | 34.1                                   | 7.1           | 23.7  | 13.4                                     | 36.9          | 22.1  |
| Feb_2013  | 40.7                              | 37.6          | 39.2  | 43.8                                   | 11.5          | 27.5  | 49.6                                     | 85.8          | 65.2  |
| Mar_2013  | 23.7                              | 40.2          | 32.8  | 10.4                                   | 36.9          | 24.7  | 15.9                                     | 22.7          | 19.7  |

Table 1.7. Infant mortality rate by month by zone

| Month     | MONTHLY INFANT MORTALITY RATE |               |       |
|-----------|-------------------------------|---------------|-------|
|           | Jimma                         | West Hararghe | Total |
| Jan_2012  | 82.8                          | 79.5          | 81.0  |
| Feb_2012  | 55.2                          | 51.2          | 52.9  |
| Mar_2012  | 4.8                           | 52.8          | 29.4  |
| Apr_2012  | 52.6                          | 65.6          | 58.5  |
| May_2012  | 44.1                          | 45.1          | 44.7  |
| Jun_2012  | 46.7                          | 42.2          | 44.1  |
| Jul_2012  | 29.7                          | 31.0          | 30.5  |
| Aug_2012  | 21.5                          | 16.5          | 18.7  |
| Sept_2012 | 56.3                          | 21.9          | 35.9  |
| Oct_2012  | 35.6                          | 29.5          | 32.4  |
| Nov_2012  | 44.0                          | 23.4          | 32.8  |
| Dec_2012  | 33.8                          | 27.1          | 30.2  |
| Jan_2013  | 30.1                          | 32.5          | 31.1  |
| Feb_2013  | 40.7                          | 37.6          | 39.2  |
| Mar_2013  | 23.7                          | 37.7          | 31.4  |

Table 1.8. Neonatal mortality rate by month by zone and gender

| <b>MONTHLY INFANT MORTALITY RATE</b> |              |                      |              |
|--------------------------------------|--------------|----------------------|--------------|
| <b>Month</b>                         | <b>Jimma</b> | <b>West Hararghe</b> | <b>Total</b> |
| Jan_2012                             | 82.8         | 79.5                 | 81.0         |
| Feb_2012                             | 55.2         | 51.2                 | 52.9         |
| Mar_2012                             | 4.8          | 52.8                 | 29.4         |
| Apr_2012                             | 52.6         | 65.6                 | 58.5         |
| May_2012                             | 44.1         | 45.1                 | 44.7         |
| Jun_2012                             | 46.7         | 42.2                 | 44.1         |
| Jul_2012                             | 29.7         | 31.0                 | 30.5         |
| Aug_2012                             | 21.5         | 16.5                 | 18.7         |
| Sept_2012                            | 56.3         | 21.9                 | 35.9         |
| Oct_2012                             | 35.6         | 29.5                 | 32.4         |
| Nov_2012                             | 44.0         | 23.4                 | 32.8         |
| Dec_2012                             | 33.8         | 27.1                 | 30.2         |
| Jan_2013                             | 30.1         | 32.5                 | 31.1         |
| Feb_2013                             | 40.7         | 37.6                 | 39.2         |
| Mar_2013                             | 23.7         | 37.7                 | 31.4         |

Table 1.9. Age at death: 0-27 days

| Age in Days | Zone  |               | Total |
|-------------|-------|---------------|-------|
|             | Jimma | West Hararghe |       |
| 0           | 43.3  | 60.2          | 100.2 |
| 1           | 3.8   | 2.5           | 6.3   |
| 2           | 4.9   | 3.2           | 8.1   |
| 3           | 1.0   | 4.6           | 5.6   |
| 4           | 3.1   | 2.3           | 5.4   |
| 5           | 0.0   | 0.5           | 0.5   |
| 6           | 3.6   | 0.9           | 4.5   |
| 7           | 0.8   | 0.0           | 0.8   |
| 8           | 0.0   | 0.0           | 0.0   |
| 9           | 2.5   | 2.5           | 5.0   |
| 10          | 0.0   | 0.9           | 0.9   |
| 11          | 2.0   | 0.0           | 2.0   |
| 12          | 1.1   | 0.0           | 0.6   |
| 13          | 1.4   | 1.1           | 2.4   |
| 14          | 0.6   | 1.7           | 2.3   |
| 15          | 0.0   | 0.0           | 0.0   |
| 16          | 0.7   | 0.0           | 0.7   |
| 17          | 1.0   | 0.0           | 1.0   |
| 18          | 0.0   | 0.7           | 0.7   |
| 19          | 1.0   | 0.0           | 1.0   |
| 20          | 1.9   | 1.5           | 3.4   |
| 21          | 0.0   | 0.0           | 0.0   |
| 22          | 0.0   | 0.9           | 0.9   |
| 23          | 0.0   | 0.0           | 0.0   |
| 24          | 0.0   | 0.0           | 0.0   |
| 25          | 0.0   | 0.0           | 0.0   |
| 26          | 0.0   | 0.7           | 0.7   |
| 27          | 0.0   | 0.9           | 0.9   |



Table 1.10. Age at death: 1-23 months

| Age in months | Zone  |               | Total |
|---------------|-------|---------------|-------|
|               | Jimma | West Hararghe |       |
| 1             | 8.1   | 9.1           | 15.5  |
| 2             | 5.8   | 3.9           | 9.7   |
| 3             | 4.4   | 4.2           | 8.6   |
| 4             | 4.3   | 4.1           | 8.3   |
| 5             | 3.2   | 1.2           | 4.4   |
| 6             | 3.0   | 6.0           | 8.9   |
| 7             | 5.1   | 0.9           | 5.5   |
| 8             | 2.1   | 0.0           | 2.1   |
| 9             | 0.0   | 5.8           | 5.8   |
| 10            | 0.0   | 0.9           | 0.9   |
| 11            | 1.6   | 0.0           | 1.6   |
| 12            | 1.0   | 0.9           | 2.0   |
| 13            | 0.0   | 0.9           | 0.9   |
| 15            | 0.9   | 0.0           | 0.9   |
| 16            | 0.0   | 0.0           | 0.0   |
| 17            | 0.0   | 0.9           | 0.9   |
| 18            | 3.9   | 2.2           | 6.1   |
| 19            | 0.0   | 0.0           | 0.0   |
| 20            | 0.5   | 0.0           | 0.5   |
| 21            | 2.4   | 0.0           | 2.4   |
| 22            | 0.0   | 0.0           | 0.0   |
| 23            | 0.0   | 0.0           | 0.0   |

Table 1.11. Age at death: 1-4 years

| Age in years | Zozne |               | Total |
|--------------|-------|---------------|-------|
|              | Jimma | West Hararghe |       |
| 1            | 2.8   | 3.8           | 11.2  |
| 2            | 1.9   | 3.8           | 13.8  |
| 3            | 3.5   | 2.8           | 7.9   |
| 4            | 1.6   | 1.9           | 13.9  |

## Appendix 2.2: Brief summary of endline validation survey data quality assessment

This section presents the overall results and data quality measures from the endline validation survey with full birth history conducted from February-May, 2013.

**Response Rate.** For the household survey, we calculated a required sample size of 28,001 households, which included allowance for a non-response rate of 10%. Among these 28,001 sampled households, our interview field teams interviewed 27,782. In total, the response rate was 99.5%, with minimal differences between the two zones. For the birth history, 99.5% of all eligible women within the selected households completed that module of the survey instrument. Hence, as shown in Table 2.1, the level of non-response was negligible both in terms of selection of households and in terms of participation of eligible women.

Table 2.1. Endline survey response rates for Households and Eligible Women by Zone

| Results                                  | ZONE   |               | TOTAL  |
|------------------------------------------|--------|---------------|--------|
|                                          | Jimma  | West Hararghe |        |
| Households selected                      | 15,330 | 12,671        | 28,001 |
| Interviewed households                   | 15,316 | 12,556        | 27,872 |
| <b>Household response rate</b>           | 99.9%  | 99.1%         | 99.5%  |
| Eligible women in interviewed households | 14,994 | 11,921        | 26,915 |
| Women interviewed                        | 14,946 | 11,845        | 26,791 |
| <b>Women's response rate</b>             | 99.7%  | 99.4%         | 99.5%  |

**Description of Sampled Households:** Table 2.2 presents the distribution of head of household, household size, and number of under-five children per household by zone. Of the households sampled, 85.6% are headed by a male, have an average household size of 5.1 persons, and on average have 0.8 children aged under 5-years of age.

Table 2.2. Sex of the head of the household, number of under-five children and household size by zone

| Characteristics          | Zone  |               |       |
|--------------------------|-------|---------------|-------|
|                          | Jimma | West Hararghe | Total |
| <b>Head of Household</b> |       |               |       |
| Male                     | 85.1  | 86.2          | 85.6  |
| Female                   | 14.9  | 13.8          | 14.4  |
| Total                    | 100   | 100           | 100   |
| <b>Household size</b>    |       |               |       |
| 1                        | 2.7   | 3.8           | 3.2   |
| 2                        | 9.5   | 10.5          | 9.9   |
| 3                        | 14.1  | 14.2          | 14.2  |
| 4                        | 16.5  | 15.1          | 15.9  |
| 5                        | 16.5  | 14.8          | 15.7  |
| 6                        | 15    | 14.3          | 14.7  |
| 7                        | 11.6  | 11.6          | 11.6  |
| 8                        | 8     | 8.4           | 8.2   |

|                                                    |        |        |        |
|----------------------------------------------------|--------|--------|--------|
| 9                                                  | 3.7    | 4.4    | 4      |
| 10 and above                                       | 2.4    | 2.9    | 2.7    |
| Total                                              | 100    | 100    | 100    |
| Mean household size                                | 5.1    | 5.1    | 5.1    |
| <b>Number of under-five children per household</b> |        |        |        |
| 0                                                  | 46.3   | 42.3   | 44.5   |
| 1                                                  | 32.7   | 30.7   | 31.8   |
| 2                                                  | 19.1   | 23.4   | 21     |
| 3                                                  | 1.9    | 3.4    | 2.6    |
| 4                                                  | 0.1    | 0.2    | 0.1    |
| 5                                                  | *      | *      | *      |
| Mean number of children under-five per household   | 0.8    | 0.9    | 0.8    |
| <b>Number of households</b>                        | 15,260 | 12,474 | 27,734 |

\* The total households here are less than the one in Table 1 as there were 128 HH with "no consent"

Table 2.3 presents the distribution of women aged 15-49 years for the two zones by their number of children ever born. In the two zones, women had 3.1 children on average. Of the sampled women aged 15-49 years old, 26.1% had not had any children.

Table 2.3. Percentage distribution of women aged 15-49 years by number of children ever born by zone

|                                   | Zone   |               |        |
|-----------------------------------|--------|---------------|--------|
|                                   | Jimma  | West Hararghe | Total  |
| <b>Number of children</b>         |        |               |        |
| 0                                 | 27.9   | 23.8          | 26.1   |
| 1                                 | 9.6    | 9.9           | 9.7    |
| 2                                 | 9.7    | 10.5          | 10     |
| 3                                 | 10.4   | 10.4          | 10.4   |
| 4                                 | 10.4   | 9.9           | 10.2   |
| 5                                 | 9.5    | 9.5           | 9.5    |
| 6                                 | 8.4    | 8.3           | 8.3    |
| 7                                 | 6      | 6.7           | 6.3    |
| 8                                 | 4.2    | 4.8           | 4.5    |
| 9                                 | 2.3    | 3.1           | 2.6    |
| >=10                              | 1.6    | 3.2           | 2.3    |
| Missing                           | 0      | 0             | 0      |
| Total                             | 100    | 100           | 100    |
| Mean number of children ever born | 3.1    | 3.4           | 3.3    |
| <b>Number of households</b>       | 14,945 | 11861         | 26,806 |

Table 2.4 documents the reporting completeness of date of birth, age at death and child survival status information in the full pregnancy history disaggregated by zone. We observe that in both zones, the variable with the most amount of either unknown or missing information is the date of birth. Of the births reported in the survey in the two zones, for 19.5% of those in Jimma and 14.9% of those in West Hararghe the respondent did not report the exact month that the birth occurred. In contrast, we note that only a negligible number of reported births were missing the year of birth, both the year and month of birth, the survival status of the child or the age at death. This suggests that in both zones, the most notable reporting challenge for survey respondents was recalling of the timing of birth events.

Table 2.4. Reporting completeness of date of birth, age at death and child survival status by zone

| Completeness of Date/Age information | Jimma |       | West Hararghe |       | Total  |       |
|--------------------------------------|-------|-------|---------------|-------|--------|-------|
|                                      | n     | %     | n             | %     | n      | %     |
| Unknown/missing month of birth       | 9,119 | 19.53 | 6,128         | 14.94 | 15,247 | 17.38 |
| Unknown/missing year of birth        | 4     | 0.01  | 0             | 0     | 4      | 0     |
| Missing both month and year of birth | 4     | 0.01  | 0             | 0     | 4      | 0     |
| Survival status unknown              | 1     | 0     | 3             | 0.01  | 4      | 0     |
| Missing age at death                 | 0     | 0     | 0             | 0     | 0      | 0     |

Table 2.5. Age and Sex distribution of the household population by zone

| Age group | Jimma |        |       | West Hararge |        |       |
|-----------|-------|--------|-------|--------------|--------|-------|
|           | Male  | Female | Total | Male         | Female | Total |
| 0-4       | 15.2  | 15.2   | 15.2  | 17.3         | 17.8   | 17.5  |
| 5-9       | 18    | 18.5   | 18.2  | 19.9         | 20.3   | 20.1  |
| 10-14     | 15.5  | 15.9   | 15.7  | 14.6         | 14.8   | 14.7  |
| 15-19     | 9.7   | 8.5    | 9.1   | 9.4          | 8.7    | 9.1   |
| 20-24     | 6     | 6.5    | 6.3   | 6.3          | 6.9    | 6.6   |
| 25-29     | 5.9   | 7.5    | 6.7   | 6.4          | 8.2    | 7.3   |
| 30-34     | 5     | 5.6    | 5.3   | 5.6          | 5.8    | 5.7   |
| 35-39     | 5.2   | 5.4    | 5.3   | 5.3          | 4.7    | 5     |
| 40-44     | 4     | 3.3    | 3.7   | 4.2          | 2.6    | 3.4   |
| 45-49     | 3.2   | 2.3    | 2.7   | 2.9          | 1.7    | 2.3   |
| 50-54     | 2.3   | 4      | 3.1   | 1.9          | 2.7    | 2.3   |
| 55-59     | 2.3   | 2.9    | 2.6   | 1.4          | 2.2    | 1.8   |
| 60-64     | 2.5   | 2      | 2.3   | 1.6          | 1.6    | 1.6   |
| 65-69     | 1.9   | 1      | 1.5   | 1.2          | 0.9    | 1.1   |
| 70-74     | 1.5   | 0.7    | 1.1   | 1            | 0.5    | 0.7   |
| 75-80     | 0.8   | 0.3    | 0.6   | 0.4          | 0.2    | 0.3   |
| 80+       | 0.9   | 0.4    | 0.6   | 0.5          | 0.3    | 0.4   |
| Missing   | 0     | 0      | 0     | 0            | 0      | 0     |
| Total     | 100   | 100    | 100   | 100          | 100    | 100   |

Table 2.6. Number of births by survival status of child, year of birth, and zone

| Year of birth | Jimma  |        |       | West Hararghe |        |       | Total  |        |       |
|---------------|--------|--------|-------|---------------|--------|-------|--------|--------|-------|
|               | Deaths | Living | Total | Deaths        | Living | Total | Deaths | Living | Total |
| 2004          | 286    | 2365   | 2651  | 245           | 2181   | 2426  | 531    | 4546   | 5077  |
| 2005          | 279    | 2662   | 2941  | 218           | 2415   | 2633  | 497    | 5077   | 5574  |
| 2006          | 293    | 2562   | 2855  | 220           | 2419   | 2639  | 513    | 4981   | 5494  |
| 2007          | 299    | 2761   | 3060  | 258           | 2402   | 2660  | 557    | 5163   | 5720  |
| 2008          | 243    | 2518   | 2761  | 202           | 2422   | 2624  | 445    | 4940   | 5385  |
| 2009          | 183    | 2444   | 2627  | 180           | 2277   | 2457  | 363    | 4721   | 5084  |
| 2010          | 181    | 2447   | 2628  | 161           | 2163   | 2324  | 342    | 4610   | 4952  |
| 2011          | 155    | 2025   | 2180  | 121           | 1938   | 2059  | 276    | 3963   | 4239  |
| 2012          | 118    | 2254   | 2372  | 105           | 2185   | 2290  | 223    | 4439   | 4662  |
| 2013          | 19     | 531    | 550   | 27            | 639    | 666   | 46     | 1170   | 1216  |
| Total         | 5774   | 40918  | 46692 | 4990          | 36021  | 41011 | 10764  | 76939  | 87703 |

*Population pyramid.* Figure 2.1 displays the age-sex distribution of sampled households for the two study zones. We observe that the age-sex distribution of households in Jimma and West Hararghe are similar, and are typical of high fertility/high mortality populations in low-income countries. Both populations have very young populations in which approximately half of the current population is under 15 years old, around 16% of the population is under 5 years of age and only 6% of the population are 55 years or older.

Figure 2.1. Population age pyramid for Jimma and West Hararghe

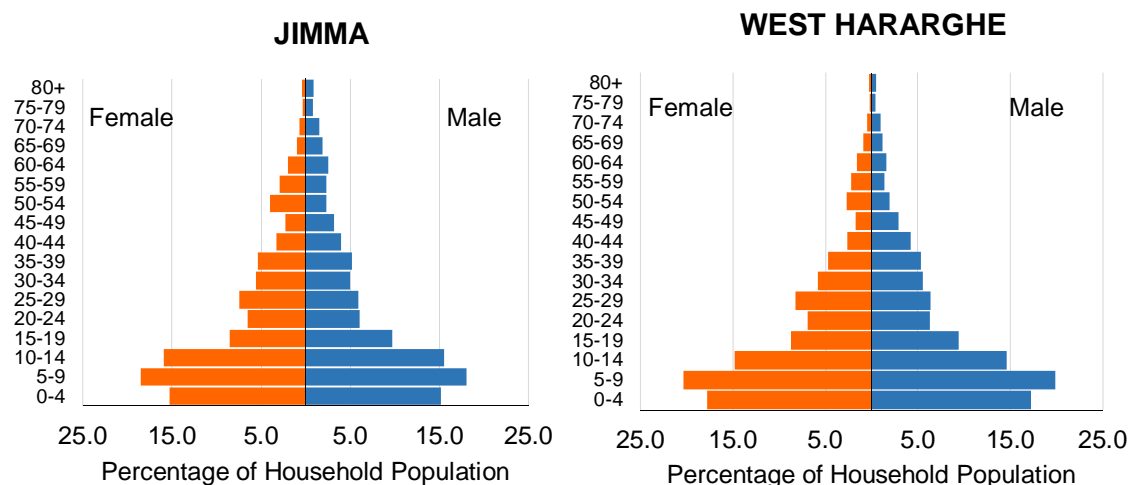

Figure 2.2 shows the age distribution of females aged 15 to 49 years in the sampled households who, by definition, were eligible to respond to the women’s questionnaire. In both zones, approximately 60% of eligible women were between the ages of 15 and 29 years. The women who were interviewed had little formal education, with approximately 70% not having received any formal education and 26.5% having a primary level education. Of the sampled women aged 15-49, 80% were or had been married.

Figure 2.2. Distribution of females in sampled households by age and by zones

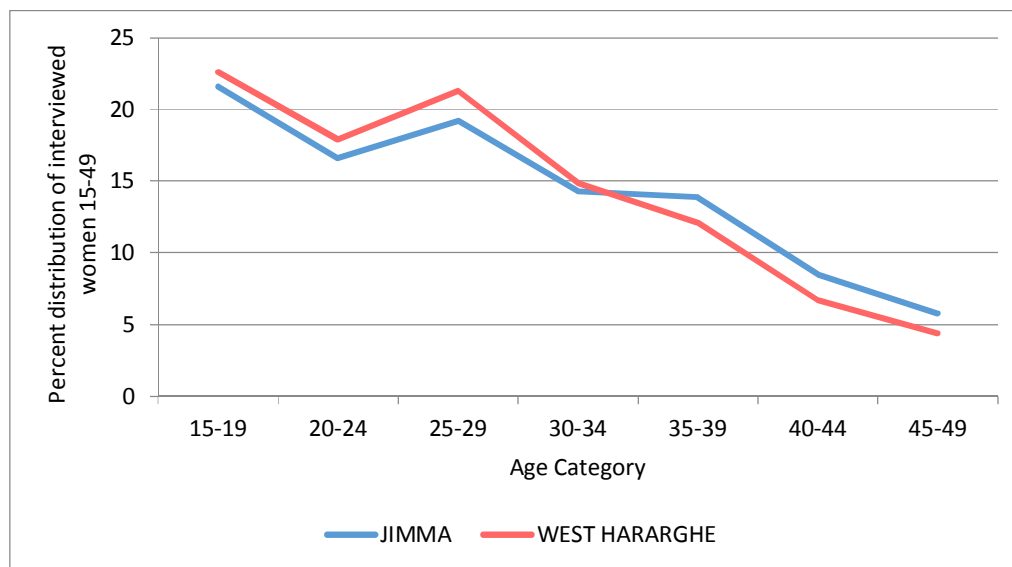

Table 2.7. Percentage distribution of interviewed women 15-49 by selected demographic characteristics and zone

|                              | Zone          |               | Total         |
|------------------------------|---------------|---------------|---------------|
|                              | Jimma         | West Hararghe |               |
| <b>Age</b>                   |               |               |               |
| 15-19                        | 21.6          | 22.6          | 22            |
| 20-24                        | 16.6          | 17.9          | 17.2          |
| 25-29                        | 19.2          | 21.3          | 20.2          |
| 30-34                        | 14.3          | 14.9          | 14.6          |
| 35-39                        | 13.9          | 12.1          | 13.1          |
| 40-44                        | 8.5           | 6.7           | 7.7           |
| 45-49                        | 5.8           | 4.4           | 5.2           |
| Missing                      | 0             | 0             | 0             |
| Total                        | 100           | 100           | 100           |
| <b>Education</b>             |               |               |               |
| No education                 | 65.3          | 76.1          | 70.1          |
| Primary                      | 30.6          | 21.4          | 26.5          |
| Secondary                    | 3             | 1.3           | 2.3           |
| Secondary or more            | 0.8           | 0.6           | 0.7           |
| Missing                      | 0.3           | 0.6           | 0.5           |
| Total                        | 100           | 100           | 100           |
| <b>Religion</b>              |               |               |               |
| Orthodox                     | 9.9           | 8             | 9.1           |
| Catholic                     | 0.5           | 1.2           | 0.8           |
| Protestant                   | 4.1           | 0.2           | 2.4           |
| Muslim                       | 85.2          | 89.8          | 87.2          |
| Traditional/animist          | 0             | 0             | 0             |
| Other                        | 0             | 0             | 0             |
| Missing                      | 0.3           | 0.6           | 0.5           |
| Total                        | 100           | 100           | 100           |
| <b>Marital status</b>        |               |               |               |
| Married Once                 | 67.5          | 78.6          | 72.4          |
| Married More than once       | 9.8           | 4.9           | 7.6           |
| Not married                  | 22.3          | 15.9          | 19.5          |
| Missing                      | 0.3           | 0.6           | 0.5           |
| Total                        | 100           | 100           | 100           |
| <b>Number of women 15-49</b> | <b>14,994</b> | <b>11,921</b> | <b>26,915</b> |

Data on births from the validation survey. Figures 2.4, 2.5 and 2.6 show the percent distribution of live births by month for Jimma, West Hararghe and both study zones, respectively for calendar years 2003-2012. We observe a notable amount of birth seasonality in the pattern of estimated births by month. In particular, over the course of the calendar year we generally observe a downward trend in estimated births whereby the magnitude of births tends to be higher for earlier months in the Gregorian calendar. However, the monthly trend by year shows no systematic outlying trends.

Figure 2.3 Distribution of births by month and year of birth in West Hararghe zone

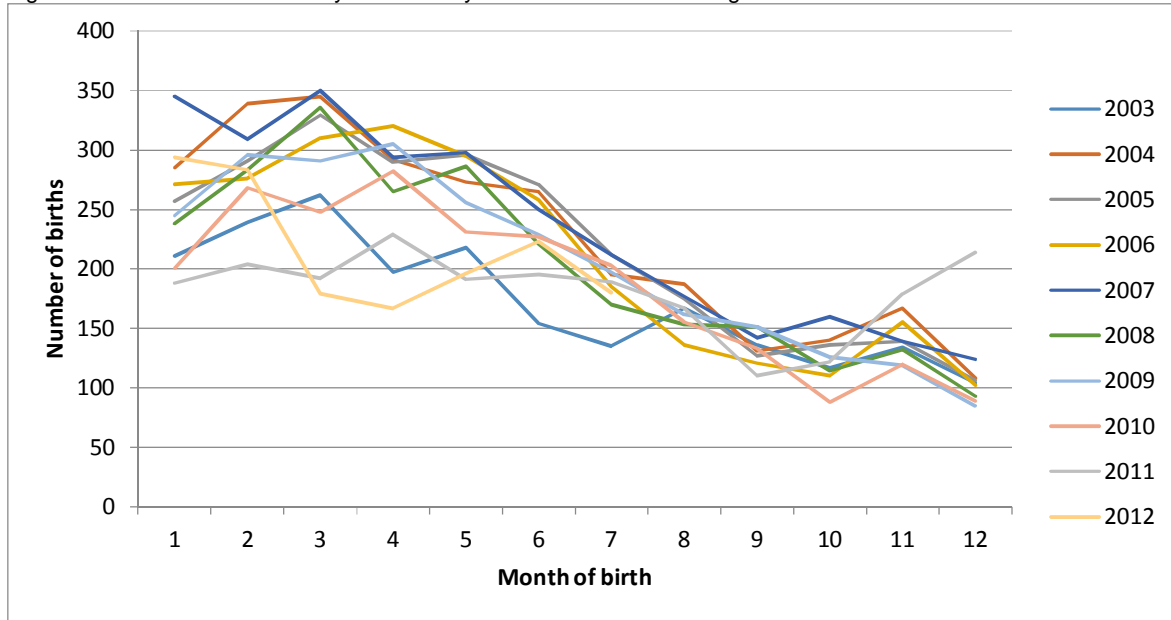

Figure 2.4. Distribution of births by month and year of birth in Jimma zone

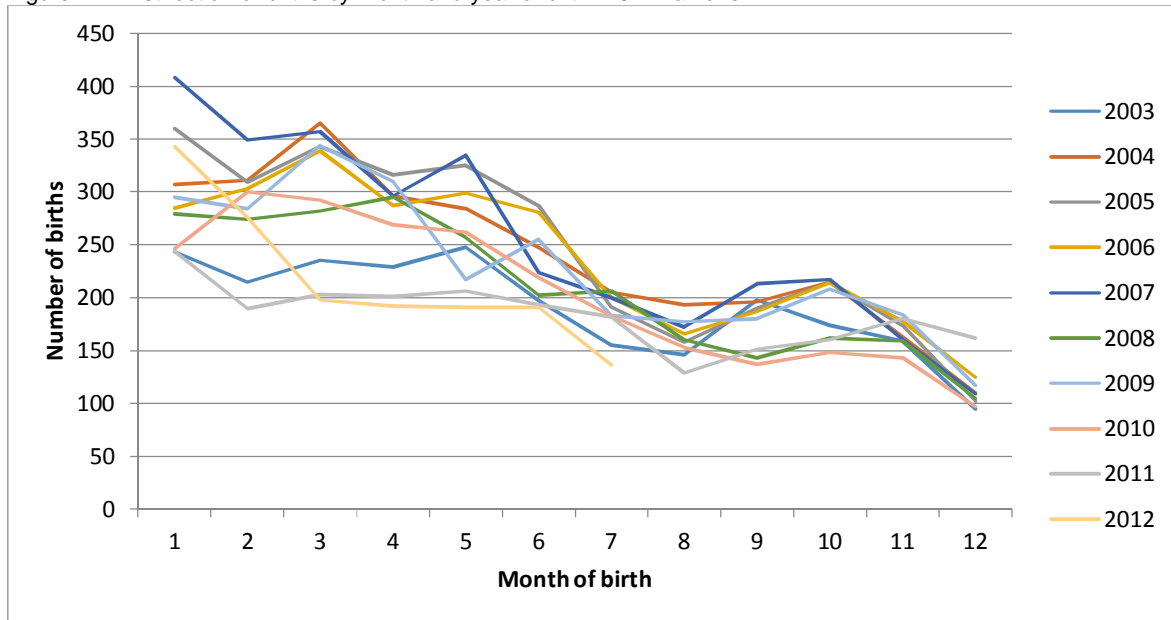

Figure 2.5. Distribution of births by month and year of birth in both zones

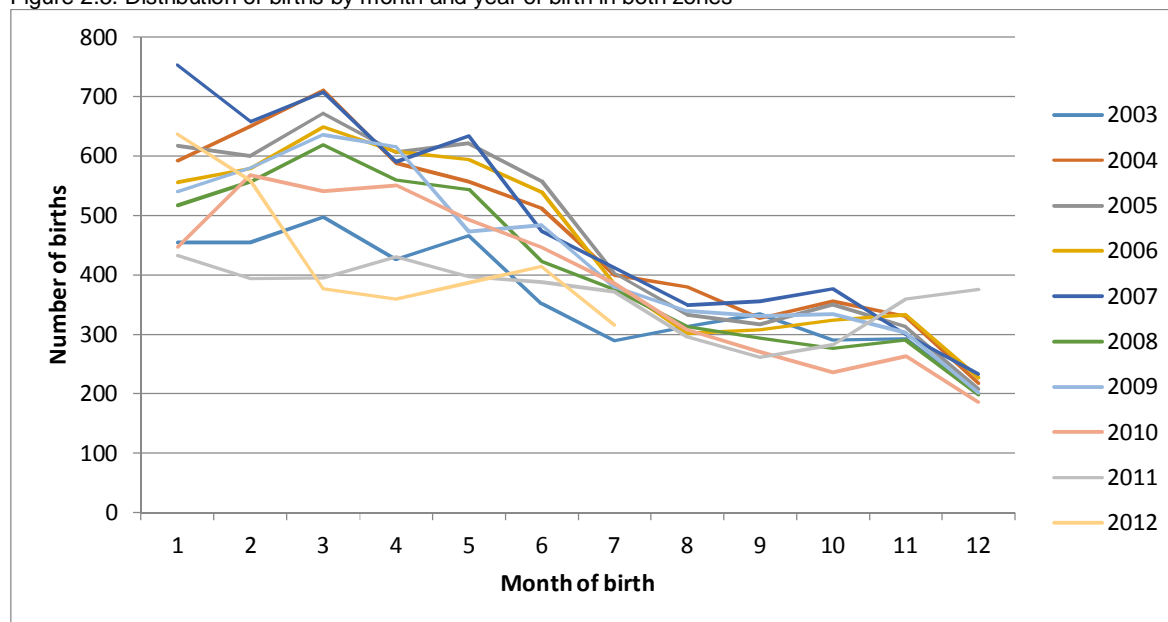

Table 2.8. Distribution of births by calendar month in Jimma zone

| Year of birth | Month of birth |             |             |             |             |             |             |             |             |             |             |             | Total        |
|---------------|----------------|-------------|-------------|-------------|-------------|-------------|-------------|-------------|-------------|-------------|-------------|-------------|--------------|
|               | 1              | 2           | 3           | 4           | 5           | 6           | 7           | 8           | 9           | 10          | 11          | 12          |              |
| 2003          | 243            | 215         | 235         | 229         | 248         | 197         | 155         | 146         | 198         | 174         | 159         | 95          | 2294         |
| 2004          | 307            | 311         | 365         | 296         | 284         | 247         | 205         | 193         | 196         | 215         | 163         | 110         | 2892         |
| 2005          | 360            | 309         | 343         | 316         | 325         | 287         | 191         | 158         | 190         | 214         | 174         | 102         | 2969         |
| 2006          | 285            | 303         | 339         | 287         | 299         | 281         | 200         | 166         | 187         | 214         | 178         | 125         | 2864         |
| 2007          | 408            | 349         | 357         | 296         | 335         | 224         | 200         | 172         | 213         | 217         | 161         | 109         | 3041         |
| 2008          | 279            | 274         | 282         | 295         | 257         | 202         | 206         | 160         | 143         | 162         | 159         | 105         | 2524         |
| 2009          | 295            | 284         | 344         | 310         | 217         | 255         | 183         | 177         | 180         | 208         | 184         | 117         | 2754         |
| 2010          | 246            | 300         | 292         | 269         | 262         | 219         | 183         | 153         | 137         | 148         | 143         | 97          | 2449         |
| 2011          | 244            | 190         | 203         | 201         | 206         | 193         | 182         | 129         | 151         | 160         | 180         | 162         | 2201         |
| 2012          | 343            | 276         | 198         | 192         | 191         | 191         | 136         |             |             |             |             |             | 1559         |
| <b>Total</b>  | <b>3010</b>    | <b>2811</b> | <b>2958</b> | <b>2691</b> | <b>2624</b> | <b>2296</b> | <b>1841</b> | <b>1484</b> | <b>1596</b> | <b>1712</b> | <b>1501</b> | <b>1023</b> | <b>25547</b> |

Table 2.9. Distribution of births by calendar month in West Hararghe zone

| Year of birth | Month of birth |     |     |     |     |     |     |     |     |     |     |     | Total |
|---------------|----------------|-----|-----|-----|-----|-----|-----|-----|-----|-----|-----|-----|-------|
|               | 1              | 2   | 3   | 4   | 5   | 6   | 7   | 8   | 9   | 10  | 11  | 12  |       |
| 2003          | 211            | 239 | 262 | 197 | 218 | 154 | 135 | 167 | 136 | 117 | 134 | 104 | 2074  |
| 2004          | 285            | 339 | 345 | 292 | 273 | 265 | 195 | 187 | 131 | 140 | 167 | 108 | 2727  |
| 2005          | 257            | 291 | 329 | 290 | 296 | 271 | 212 | 175 | 127 | 136 | 139 | 106 | 2629  |
| 2006          | 271            | 276 | 310 | 320 | 295 | 258 | 185 | 136 | 121 | 110 | 155 | 102 | 2539  |
| 2007          | 345            | 309 | 350 | 294 | 298 | 250 | 212 | 177 | 142 | 160 | 139 | 124 | 2800  |
| 2008          | 238            | 283 | 336 | 265 | 286 | 221 | 170 | 153 | 151 | 114 | 132 | 93  | 2442  |
| 2009          | 245            | 296 | 291 | 305 | 256 | 229 | 197 | 162 | 151 | 126 | 119 | 85  | 2462  |
| 2010          | 201            | 268 | 248 | 282 | 231 | 227 | 203 | 155 | 133 | 88  | 120 | 89  | 2245  |
| 2011          | 188            | 204 | 192 | 229 | 191 | 195 | 189 | 167 | 110 | 122 | 179 | 214 | 2180  |
| 2012          | 294            | 283 | 179 | 167 | 196 | 223 | 180 |     |     |     |     |     | 1589  |



|       |      |      |      |      |      |      |      |      |      |      |      |      |       |
|-------|------|------|------|------|------|------|------|------|------|------|------|------|-------|
| Total | 2535 | 2788 | 2842 | 2641 | 2540 | 2293 | 1878 | 1545 | 1203 | 1113 | 1284 | 1025 | 23687 |
|-------|------|------|------|------|------|------|------|------|------|------|------|------|-------|

Table 2.10. Distribution of births by calendar month in both zones

| Year of birth | Month of birth |      |      |      |      |      |      |      |      |      |      |      | Total |
|---------------|----------------|------|------|------|------|------|------|------|------|------|------|------|-------|
|               | 1              | 2    | 3    | 4    | 5    | 6    | 7    | 8    | 9    | 10   | 11   | 12   |       |
| 2003          | 454            | 454  | 497  | 426  | 466  | 351  | 290  | 313  | 334  | 291  | 293  | 199  | 4368  |
| 2004          | 592            | 650  | 710  | 588  | 557  | 512  | 400  | 380  | 327  | 355  | 330  | 218  | 5619  |
| 2005          | 617            | 600  | 672  | 606  | 621  | 558  | 403  | 333  | 317  | 350  | 313  | 208  | 5598  |
| 2006          | 556            | 579  | 649  | 607  | 594  | 539  | 385  | 302  | 308  | 324  | 333  | 227  | 5403  |
| 2007          | 753            | 658  | 707  | 590  | 633  | 474  | 412  | 349  | 355  | 377  | 300  | 233  | 5841  |
| 2008          | 517            | 557  | 618  | 560  | 543  | 423  | 376  | 313  | 294  | 276  | 291  | 198  | 4966  |
| 2009          | 540            | 580  | 635  | 615  | 473  | 484  | 380  | 339  | 331  | 334  | 303  | 202  | 5216  |
| 2010          | 447            | 568  | 540  | 551  | 493  | 446  | 386  | 308  | 270  | 236  | 263  | 186  | 4694  |
| 2011          | 432            | 394  | 395  | 430  | 397  | 388  | 371  | 296  | 261  | 282  | 359  | 376  | 4381  |
| 2012          | 637            | 559  | 377  | 359  | 387  | 414  | 316  |      |      |      |      |      |       |
| Total         | 5545           | 5599 | 5800 | 5332 | 5164 | 4589 | 3719 | 3029 | 2799 | 2825 | 2785 | 2048 | 49234 |

*Internal data quality assessment: Sex ratio at birth.* The sex ratio at birth in normal populations is generally between 102 to 107 males per 100 females. Large departures from this range may suggest differential omission of births by sex. Figure 2.6 shows sex ratios at birth calculated as the number of males per 100 females. We observe that that for the 10 years preceding the survey, the sex ratio at birth is generally between 100 and 110 males per female. This suggests that there are no irregularities in the actual sex ratio at birth or its reporting in the two study zones. This observation is consistent with the estimated sex ratios at birth documented in the 2011 Ethiopia DHS.

Figure 2.6. Sex Ratio at birth for births 2003-2012

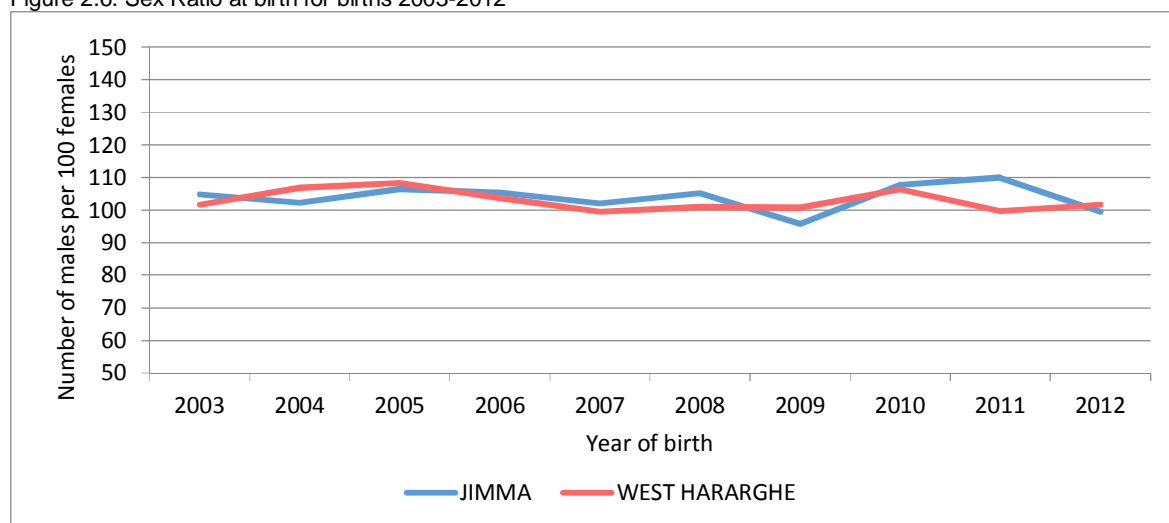

Table 2.11. Sex ratio at birth by year and zone

| Year | Jimma |         |       | West Hararghe |         |       | Total |         |       |
|------|-------|---------|-------|---------------|---------|-------|-------|---------|-------|
|      | Males | Females | Total | Males         | Females | Total | Males | Females | Total |
| 1997 | 897   | 777     | 1674  | 804           | 655     | 1459  | 1701  | 1432    | 3133  |
| 1998 | 829   | 815     | 1644  | 647           | 628     | 1275  | 1476  | 1443    | 2919  |
| 1999 | 970   | 947     | 1917  | 803           | 807     | 1610  | 1773  | 1754    | 3527  |
| 2000 | 1138  | 1088    | 2226  | 944           | 879     | 1823  | 2082  | 1967    | 4049  |
| 2001 | 960   | 909     | 1869  | 844           | 771     | 1615  | 1804  | 1680    | 3484  |
| 2002 | 1431  | 1326    | 2757  | 1275          | 1238    | 2513  | 2706  | 2564    | 5270  |
| 2003 | 1174  | 1120    | 2294  | 1046          | 1028    | 2074  | 2220  | 2148    | 4368  |
| 2004 | 1462  | 1430    | 2892  | 1409          | 1318    | 2727  | 2871  | 2748    | 5619  |
| 2005 | 1531  | 1438    | 2969  | 1366          | 1262    | 2628  | 2897  | 2700    | 5597  |
| 2006 | 1469  | 1394    | 2863  | 1292          | 1247    | 2539  | 2761  | 2641    | 5402  |
| 2007 | 1536  | 1504    | 3040  | 1396          | 1404    | 2800  | 2932  | 2908    | 5840  |
| 2008 | 1294  | 1230    | 2524  | 1227          | 1215    | 2442  | 2521  | 2445    | 4966  |
| 2009 | 1346  | 1406    | 2752  | 1236          | 1226    | 2462  | 2582  | 2632    | 5214  |
| 2010 | 1269  | 1178    | 2447  | 1157          | 1088    | 2245  | 2426  | 2266    | 4692  |
| 2011 | 1151  | 1046    | 2197  | 1088          | 1091    | 2179  | 2239  | 2137    | 4376  |
| 2012 | 775   | 779     | 1554  | 801           | 788     | 1589  | 1576  | 1567    | 3143  |

*Internal data quality assessment: Age at death.* Another important indicator of the quality of data on under-five mortality is the distribution of age at death of reported neonatal and under-five deaths. Deaths among children under-five decline rapidly with increasing age, with largest number of deaths reported during the first few days of life. Errors in age reporting can affect mortality estimation. Figures 2.7 and 2.8 show the distribution of neonatal deaths by age in days and the per month distribution of children who died between the ages of one and 23 months by age at death. The observed distributions are typical of empirical surveys and the tendency for deaths to “heap” at certain ages. For age at death for neonates, these data show heaping at ages 5, 7, 10, 14, 15, 20, and 21 days, in addition to the expected heaping at ages 0 and 1 days. For children who died between the ages of one and 23 months, the distribution shows notable heaping at age 6, 12 and 18 months of age for both zones. If respondents round up their reporting of age in months, then this particular pattern would lead to an under-estimation of the infant mortality rate and an over-estimation of the child mortality rate. The under-five mortality rate will not be affected.

Figure 2.7. Distribution of neonatal deaths by age at death in days (births 2003 – 2012)

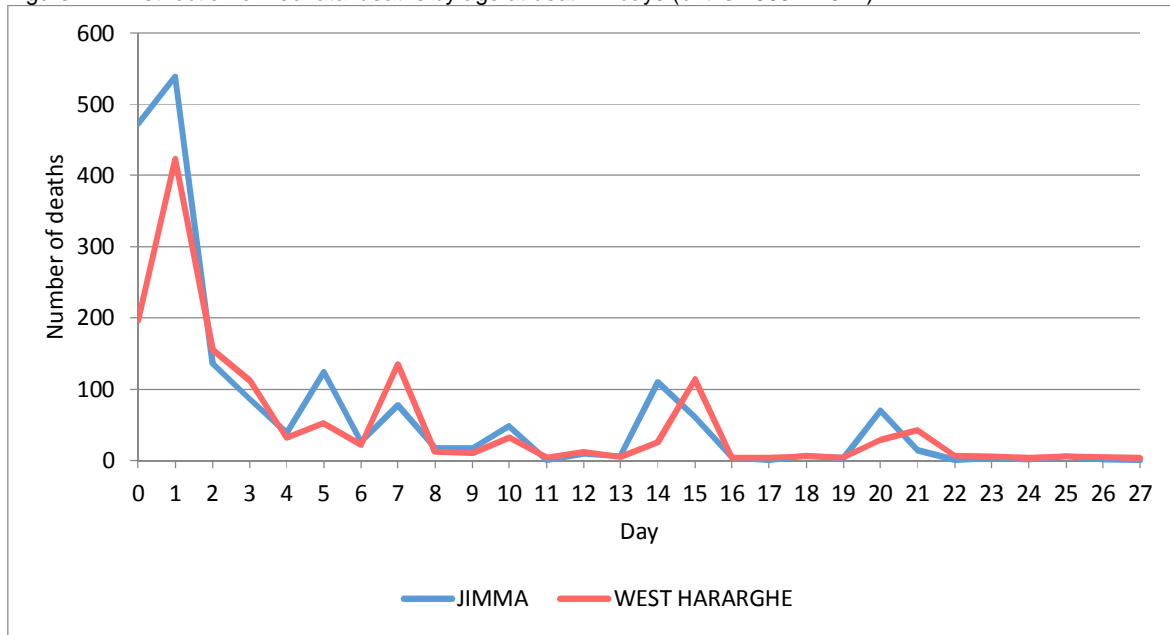

Figure 2.8. Distribution of children who died between ages of 1 month and 23 months by age at death in month (births 2003 – 2012)

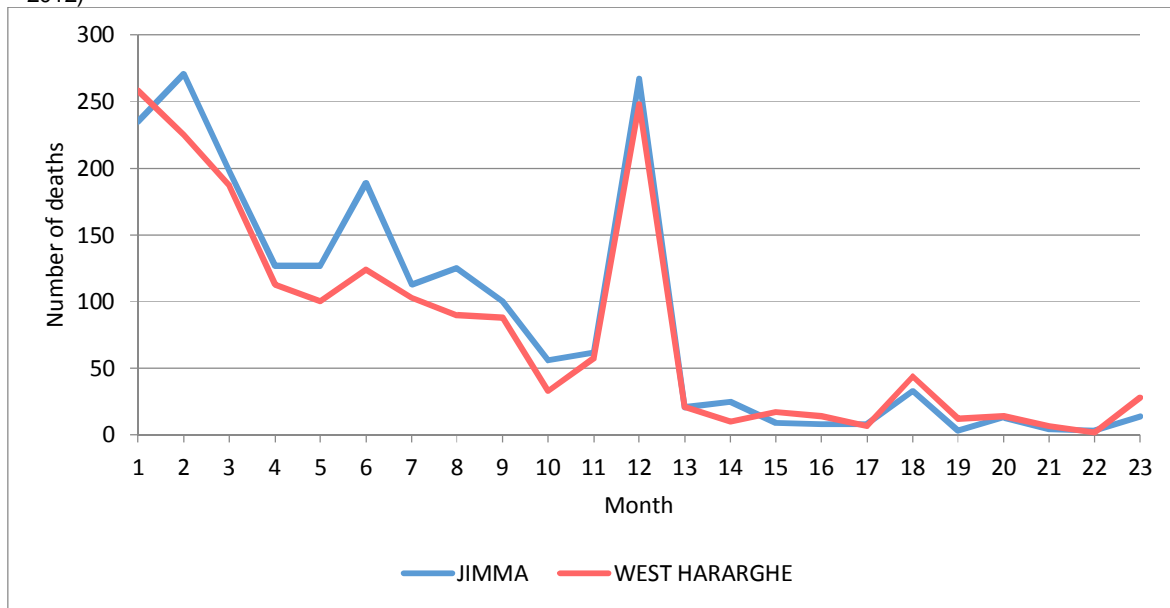

Table 2.12. Births in five years preceding past five years (2008-2012: Gregorian calendar): age at death 0-30 days

| 0-30 Days | Jimma | West Hararghe | Total |
|-----------|-------|---------------|-------|
| 0         | 99    | 50            | 149   |
| 1         | 116   | 105           | 221   |
| 2         | 17    | 32            | 49    |
| 3         | 16    | 26            | 42    |
| 4         | 6     | 6             | 12    |
| 5         | 21    | 7             | 28    |
| 6         | 8     | 6             | 14    |

|       |     |     |     |
|-------|-----|-----|-----|
| 7     | 14  | 28  | 42  |
| 8     | 5   | 3   | 8   |
| 9     | 3   | 1   | 4   |
| 10    | 4   | 4   | 8   |
| 11    | 0   | 1   | 1   |
| 12    | 3   | 2   | 5   |
| 13    | 3   | 1   | 4   |
| 14    | 35  | 6   | 41  |
| 15    | 16  | 22  | 38  |
| 16    | 1   | 1   | 2   |
| 17    | 0   | 2   | 2   |
| 18    | 3   | 1   | 4   |
| 19    | 0   | 1   | 1   |
| 20    | 7   | 5   | 12  |
| 21    | 1   | 11  | 12  |
| 22    | 0   | 3   | 3   |
| 23    | 1   | 2   | 3   |
| 24    | 0   | 0   | 0   |
| 25    | 2   | 1   | 3   |
| 26    | 1   | 1   | 2   |
| 27    | 0   | 1   | 1   |
| 28    | 1   | 3   | 4   |
| 29    | 1   | 2   | 3   |
| 30    | 1   | 3   | 4   |
| Total | 385 | 337 | 722 |

Table 2.13. Births in five years preceding past five years (2008-2012: Gregorian calendar): age at death 0-23 months

| 0-23 months | Jimma | West Hararghe | Total |
|-------------|-------|---------------|-------|
| 0           | 385   | 337           | 722   |
| 1           | 31    | 37            | 68    |
| 2           | 38    | 42            | 80    |
| 3           | 31    | 26            | 57    |
| 4           | 28    | 25            | 53    |
| 5           | 23    | 20            | 43    |
| 6           | 21    | 19            | 40    |
| 7           | 17    | 16            | 33    |
| 8           | 20    | 12            | 32    |
| 9           | 11    | 10            | 21    |
| 10          | 6     | 9             | 15    |
| 11          | 9     | 7             | 16    |
| 12          | 38    | 39            | 77    |
| 13          | 1     | 2             | 3     |
| 14          | 1     | 3             | 4     |
| 15          | 2     | 1             | 3     |
| 16          | 1     | 2             | 3     |
| 17          | 2     | 0             | 2     |
| 18          | 4     | 5             | 9     |
| 19          | 0     | 0             | 0     |
| 20          | 1     | 2             | 3     |
| 21          | 1     | 0             | 1     |
| 22          | 1     | 0             | 1     |
| 23          | 3     | 1             | 4     |
| Total       | 675   | 615           | 1290  |

Table 2.14. Births in five years preceding past five years (2003-2007: Gregorian calendar): age at death 0-30 days

| <b>0 – 30 days</b> | <b>Jimma</b> | <b>West Hararghe</b> | <b>Total</b> |
|--------------------|--------------|----------------------|--------------|
| 0                  | 130          | 56                   | 186          |
| 1                  | 137          | 132                  | 269          |
| 2                  | 38           | 34                   | 72           |
| 3                  | 23           | 29                   | 52           |
| 4                  | 12           | 5                    | 17           |
| 5                  | 39           | 16                   | 55           |
| 6                  | 5            | 5                    | 10           |
| 7                  | 21           | 34                   | 55           |
| 8                  | 7            | 4                    | 11           |
| 9                  | 4            | 4                    | 8            |
| 10                 | 16           | 11                   | 27           |
| 11                 | 0            | 1                    | 1            |
| 12                 | 3            | 4                    | 7            |
| 13                 | 1            | 0                    | 1            |
| 14                 | 26           | 6                    | 32           |
| 15                 | 13           | 32                   | 45           |
| 16                 | 2            | 1                    | 3            |
| 17                 | 0            | 1                    | 1            |
| 18                 | 1            | 1                    | 2            |
| 19                 | 1            | 2                    | 3            |
| 20                 | 19           | 10                   | 29           |
| 21                 | 1            | 8                    | 9            |
| 22                 | 0            | 0                    | 0            |
| 23                 | 0            | 0                    | 0            |
| 24                 | 1            | 2                    | 3            |
| 25                 | 1            | 3                    | 4            |
| 26                 | 1            | 0                    | 1            |
| 27                 | 0            | 1                    | 1            |
| 28                 | 1            | 2                    | 3            |
| 29                 | 0            | 1                    | 1            |
| 30                 | 4            | 1                    | 5            |
|                    |              |                      | 0            |
| Total              | 507          | 406                  | 913          |

Table 2.15. Births in five years preceding past five years (2003-2007: Gregorian calendar): age at death 0-23 months

| <b>0-23 months</b> | <b>Jimma</b> | <b>West Hararghe</b> | <b>Total</b> |
|--------------------|--------------|----------------------|--------------|
| 0                  | 913          | 507                  | 1420         |
| 1                  | 142          | 69                   | 211          |
| 2                  | 119          | 60                   | 179          |
| 3                  | 95           | 47                   | 142          |
| 4                  | 60           | 34                   | 94           |
| 5                  | 57           | 26                   | 83           |
| 6                  | 81           | 47                   | 128          |
| 7                  | 56           | 27                   | 83           |
| 8                  | 56           | 28                   | 84           |
| 9                  | 42           | 17                   | 59           |
| 10                 | 14           | 7                    | 21           |
| 11                 | 31           | 16                   | 47           |
| 12                 | 130          | 70                   | 200          |
| 13                 | 13           | 7                    | 20           |
| 14                 | 7            | 5                    | 12           |

|       |      |     |      |
|-------|------|-----|------|
| 15    | 7    | 2   | 9    |
| 16    | 6    | 2   | 8    |
| 17    | 8    | 5   | 13   |
| 18    | 12   | 6   | 18   |
| 19    | 4    | 1   | 5    |
| 20    | 8    | 7   | 15   |
| 21    | 4    | 2   | 6    |
| 22    | 1    | 0   | 1    |
| 23    | 8    | 3   | 11   |
| Total | 1874 | 995 | 2869 |

Age patterns of deaths: ratio of early neonatal to neonatal deaths, neonatal deaths to infant deaths, and infant to under-five deaths. Table 2.16 presents the ratios of early neonatal to neonatal deaths, the ratio of neonatal to infant deaths, and the ratio of infant to under-five deaths from our validation survey and those from the 2011 DHS surveys for the Oromia region. The ratio of early neonatal to neonatal deaths is generally within the range of 0.70 to 0.75 for the 5-year period immediately preceding the survey and the earlier 5-year period 2003-2007.

The ratio of neonatal to infant deaths is approximately 0.6 for both zones for the five-years preceding the survey, and ranges from 0.3 to 0.46 for the period 2003-2007. This notable differential between the two recall periods suggests that when respondents retrospectively report neonatal deaths, their reports that refer to earlier years may be subject to relative under-reporting as a result of recall bias.

Table 2.16. Comparison of the ratio of early neonatal to neonatal deaths, neonatal to infant deaths, and infant to under-five deaths from the endline survey in Jimma and West Hararghe, January 2012 – March 2013

| Ratio                             | Year      |               |        |           |               |        | All deaths |               |        |
|-----------------------------------|-----------|---------------|--------|-----------|---------------|--------|------------|---------------|--------|
|                                   | 2008-2012 |               |        | 2003-2007 |               |        | Jimma      | West Hararghe | Total  |
|                                   | Jimma     | West Hararghe | Total  | Jimma     | West Hararghe | Total  |            |               |        |
| Early neonatal to neonatal deaths | 0.7389    | 0.6988        | 0.7203 | 0.7535    | 0.6733        | 0.7178 | 0.7537     | 0.6762        | 0.7198 |
| Neonatal to infant deaths         | 0.6177    | 0.5929        | 0.6059 | 0.3019    | 0.4565        | 0.3555 | 0.5393     | 0.5138        | 0.5278 |
| Infant to Under-five deaths       | .7955     | .7971         | .7962  | .6960     | .7338         | .7133  | .7346      | .7589         | .7157  |

## Appendix 2.3: RMM community-based validation

Table 3.1. Number of HEWs reporting by month and zone

| Month     | Jimma | West Hararghe |
|-----------|-------|---------------|
| Jan_2012  | 77    | 76            |
| Feb_2012  | 77    | 76            |
| Mar_2012  | 76    | 77            |
| Apr_2012  | 75    | 78            |
| May_2012  | 76    | 78            |
| Jun_2012  | 72    | 75            |
| Jul_2012  | 71    | 78            |
| Aug_2012  | 74    | 78            |
| Sept_2012 | 76    | 80            |
| Oct_2012  | 77    | 80            |
| Nov_2012  | 75    | 80            |
| Dec_2012  | 66    | 80            |
| Jan_2013  | 77    | 80            |
| Feb_2013  | 78    | 80            |
| Mar_2013  | 74    | 80            |

# Appendix 2.4: RMM Ethiopia questionnaires and forms

## Form 4.1. Family Folder

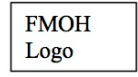

### Federal Ministry of Health Family Folder for the Health Extension Program

Region: \_\_\_\_\_ Woreda: \_\_\_\_\_ Kebele: \_\_\_\_\_ Gote: \_\_\_\_\_

Family number/House number \_\_\_\_\_ Date of first registration \_\_\_\_/\_\_\_\_/\_\_\_\_

Name of head of the family \_\_\_\_\_ Father \_\_\_\_\_ Grand father \_\_\_\_\_ TIN \_\_\_\_\_

#### Household members' description

| Individual ID | Name | Date of Birth | Place of Birth | Sex M/F | Occupation | Marital status S/M/D/W | Date died |
|---------------|------|---------------|----------------|---------|------------|------------------------|-----------|
|               |      | __/__/__      |                |         |            |                        | __/__/__  |
|               |      | __/__/__      |                |         |            |                        | __/__/__  |
|               |      | __/__/__      |                |         |            |                        | __/__/__  |
|               |      | __/__/__      |                |         |            |                        | __/__/__  |
|               |      | __/__/__      |                |         |            |                        | __/__/__  |
|               |      | __/__/__      |                |         |            |                        | __/__/__  |
|               |      | __/__/__      |                |         |            |                        | __/__/__  |
|               |      | __/__/__      |                |         |            |                        | __/__/__  |
|               |      | __/__/__      |                |         |            |                        | __/__/__  |
|               |      | __/__/__      |                |         |            |                        | __/__/__  |

#### Household characteristics

##### Latrine

|         |      |                     |
|---------|------|---------------------|
| Latrine | Type | Date having latrine |
| N / Y   |      | __/__/__            |

##### Hand washing facility

|                       |      |                                                        |
|-----------------------|------|--------------------------------------------------------|
| Hand washing facility | Type | Date securing hand washing facility with soap/ash/sand |
| N / Y                 |      | __/__/__                                               |

##### Waste disposal system

|                                        |      |                                   |
|----------------------------------------|------|-----------------------------------|
| Solid waste disposal system available  | Type | Date having waste disposal system |
| N / Y                                  |      | __/__/__                          |
| Liquid waste disposal system available |      | __/__/__                          |
| N / Y                                  |      | __/__/__                          |

##### Drinking water source

|                              |
|------------------------------|
| Drinking water source (type) |
|                              |

##### LLITN issued

| ITN Issued Date | Number issued | Currently available enter date |          |
|-----------------|---------------|--------------------------------|----------|
|                 |               | Y/N                            | __/__/__ |
|                 |               | Y/N                            | __/__/__ |

FMOH Ver 1/01



Region: \_\_\_\_\_ Woreda: \_\_\_\_\_ Kebele: \_\_\_\_\_ Gote: \_\_\_\_\_

Family number/House number \_\_\_\_\_

Date of first registration \_\_\_/\_\_\_/\_\_\_\_

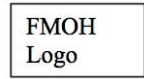

Name of head of the family \_\_\_\_\_ Father \_\_\_\_\_ Grand father \_\_\_\_\_ TIN \_\_\_\_\_

**HEP Packages training status**

| HEP packages                                | Training date started | Training date completed | Remark |
|---------------------------------------------|-----------------------|-------------------------|--------|
| Hygiene and Environmental Sanitation        |                       |                         |        |
| Excreta disposal                            | ___/___/___           | ___/___/___             |        |
| Solid and liquid waste disposal             | ___/___/___           | ___/___/___             |        |
| Water supply and safety measures            | ___/___/___           | ___/___/___             |        |
| Food hygiene and safety measures            | ___/___/___           | ___/___/___             |        |
| Healthy home environment                    | ___/___/___           | ___/___/___             |        |
| Control of insects and rodents              | ___/___/___           | ___/___/___             |        |
| Personal hygiene                            | ___/___/___           | ___/___/___             |        |
| Family Health                               |                       |                         |        |
| Maternal and Child health                   | ___/___/___           | ___/___/___             |        |
| Family planning                             | ___/___/___           | ___/___/___             |        |
| Immunization                                | ___/___/___           | ___/___/___             |        |
| Nutrition                                   | ___/___/___           | ___/___/___             |        |
| Adolescent Reproductive health              | ___/___/___           | ___/___/___             |        |
| Disease Prevention and control              |                       |                         |        |
| HIV/AIDS, STI and TB prevention and control | ___/___/___           | ___/___/___             |        |
| Malaria Prevention and control              | ___/___/___           | ___/___/___             |        |
| First Aid Emergency measures                | ___/___/___           | ___/___/___             |        |
| Health Education and Communication          | ___/___/___           | ___/___/___             |        |

**Household implementation status on the HEW packages**

| Household activities | Date        | Remark |
|----------------------|-------------|--------|
| Registration         | ___/___/___ |        |
| Training             | ___/___/___ |        |
| Graduation           | ___/___/___ |        |
| Advance Training     | ___/___/___ |        |

**Notes**

|  |
|--|
|  |
|  |
|  |
|  |
|  |
|  |
|  |
|  |
|  |
|  |
|  |
|  |
|  |
|  |
|  |
|  |
|  |
|  |
|  |

**Federal Ministry of Health  
Integrated Antenatal, Delivery, Postnatal and Newborn Care Card**

FMOH  
Logo

| Pre Pregnancy status                                                         |                              |                               | Pregnancy follow up            |          |          |          |          |
|------------------------------------------------------------------------------|------------------------------|-------------------------------|--------------------------------|----------|----------|----------|----------|
| Individual ID Woman                                                          | Gravidity                    |                               | Visits                         | 1st      | 2nd      | 3rd      | 4th      |
|                                                                              | Parity                       |                               | Date of Visit                  | __/__/__ | __/__/__ | __/__/__ | __/__/__ |
| New Born ID                                                                  | LMP                          | __/__/__                      | GA                             |          |          |          |          |
|                                                                              | EDD                          | __/__/__                      | BP                             |          |          |          |          |
|                                                                              | Referred for STI testing (☐) |                               | FHB                            |          |          |          |          |
|                                                                              | Referred for HIV testing (☐) | HIV test result<br>R / NR / I | Anemia/<br>Edema               |          |          |          |          |
| <b>Obstetric history</b>                                                     |                              |                               | <b>Remarks</b>                 |          |          |          |          |
| 1. Previous stillbirth or neonatal loss? N/Y                                 |                              |                               |                                |          |          |          |          |
| 2. History of 3 or more consecutive spontaneous abortions? N/Y               |                              |                               |                                |          |          |          |          |
| 3. Birth weight of last baby < 2500g N/Y                                     |                              |                               |                                |          |          |          |          |
| 4. Birth weight of last baby > 4000g N/Y                                     |                              |                               |                                |          |          |          |          |
| 5. Hospitalization for hypertension or pre-eclampsia/eclampsia? N/Y          |                              |                               |                                |          |          |          |          |
| 6. Previous C/S N/Y                                                          |                              |                               |                                |          |          |          |          |
| <b>Current pregnancy</b>                                                     |                              |                               | <b>Sign/symptom of illness</b> |          |          |          |          |
| 7. Age less than 16 years? N/Y                                               |                              |                               |                                |          |          |          |          |
| 8. Age more than 40 years? N/Y                                               |                              |                               |                                |          |          |          |          |
| 9. Height less than 150cm? N/Y                                               |                              |                               | <b>Action taken</b>            |          |          |          |          |
| 10. Vaginal bleeding? N/Y                                                    |                              |                               |                                |          |          |          |          |
| 11. Diastolic blood pressure 90mm Hg or more at booking? N/Y                 |                              |                               |                                |          |          |          |          |
| <b>General medical history</b>                                               |                              |                               | <b>Remarks</b>                 |          |          |          |          |
| 12. Diabetes mellitus? N/Y                                                   |                              |                               |                                |          |          |          |          |
| 13. Renal disease? N/Y                                                       |                              |                               |                                |          |          |          |          |
| 14. Cardiac disease? N/Y                                                     |                              |                               |                                |          |          |          |          |
| 15. Known substance abuse? N/Y                                               |                              |                               |                                |          |          |          |          |
| 16. Any other severe medical disease or condition like malaria, TB, HIV: N/Y |                              |                               |                                |          |          |          |          |
| <b>Delivery</b>                                                              |                              |                               | <b>Postnatal care</b>          |          |          |          |          |
| BP                                                                           |                              |                               | Visits                         |          |          |          |          |
| FHB                                                                          |                              |                               | Date of visit                  |          |          |          |          |
| Membrane (Intact/Ruptured)                                                   |                              |                               | 1st                            |          |          |          |          |
| Delivery date and time                                                       |                              |                               | 2nd                            |          |          |          |          |
| <b>Delivery Out come</b>                                                     |                              |                               | 3rd                            |          |          |          |          |
| Normal N/Y                                                                   |                              |                               | Date of visit                  |          |          |          |          |
| Complicated and referred N/Y                                                 |                              |                               | Sign/symptom of illness        |          |          |          |          |
| Maternal death N/Y                                                           |                              |                               |                                |          |          |          |          |
| Birth Attendant                                                              |                              |                               |                                |          |          |          |          |
| Health Worker <input type="checkbox"/>                                       |                              |                               | <b>Action taken</b>            |          |          |          |          |
| HEW <input type="checkbox"/>                                                 |                              |                               |                                |          |          |          |          |
| TBA <input type="checkbox"/>                                                 |                              |                               |                                |          |          |          |          |
| <b>Newborn Outcome</b>                                                       |                              |                               | <b>Remarks</b>                 |          |          |          |          |
| Live birth N/Y                                                               |                              |                               |                                |          |          |          |          |
| Sex (M/F)                                                                    |                              |                               |                                |          |          |          |          |
| Weight in gram                                                               |                              |                               |                                |          |          |          |          |
| Still birth N/Y                                                              |                              |                               |                                |          |          |          |          |
| Neonatal death N/Y                                                           |                              |                               |                                |          |          |          |          |
| Dead (age in days)                                                           |                              |                               | <b>Remarks</b>                 |          |          |          |          |

FMOH Ver 1/01

Name: \_\_\_\_\_ DOB: \_\_\_\_\_ Individual ID: \_\_\_\_\_

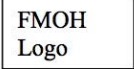

| Immunization                           |               |             |               |             |                                      |         |
|----------------------------------------|---------------|-------------|---------------|-------------|--------------------------------------|---------|
| Protected at birth against Tetanus (✓) | Vaccine       | Date        | Vaccine       | Date        | Vaccine                              | Date    |
|                                        |               | BCG         | ___/___/___   | OPV-2       | ___/___/___                          | Measles |
| OPV-0                                  |               | ___/___/___ | Pentavalent-2 | ___/___/___ |                                      |         |
|                                        | OPV-1         | ___/___/___ | OPV-3         | ___/___/___ | Fully immunized by first birthday(✓) |         |
|                                        | Pentavalent-1 | ___/___/___ | Pentavalent-3 | ___/___/___ |                                      |         |

| Growth Monitoring |        |      |             |             |             |
|-------------------|--------|------|-------------|-------------|-------------|
| Vitamin A(✓)      | Visits | 1st  | 2nd         | 3rd         | 4th         |
|                   |        | Date | ___/___/___ | ___/___/___ | ___/___/___ |
| Weight in Kg      |        |      |             |             |             |
| Height in cm      |        |      |             |             |             |
| MUAC in cm        |        |      |             |             |             |
| Action taken      |        |      |             |             |             |

## Weight-for-age GIRLS

Birth to 5 years (z-scores)

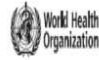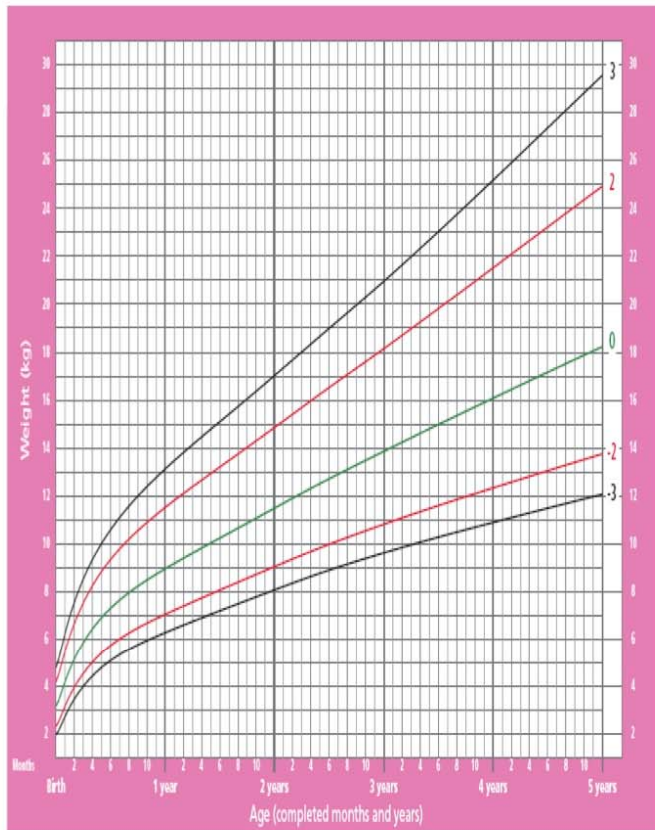

WHO Child Growth Standards

## Length/height-for-age GIRLS

Birth to 5 years (z-scores)

FMOH  
Logo

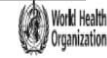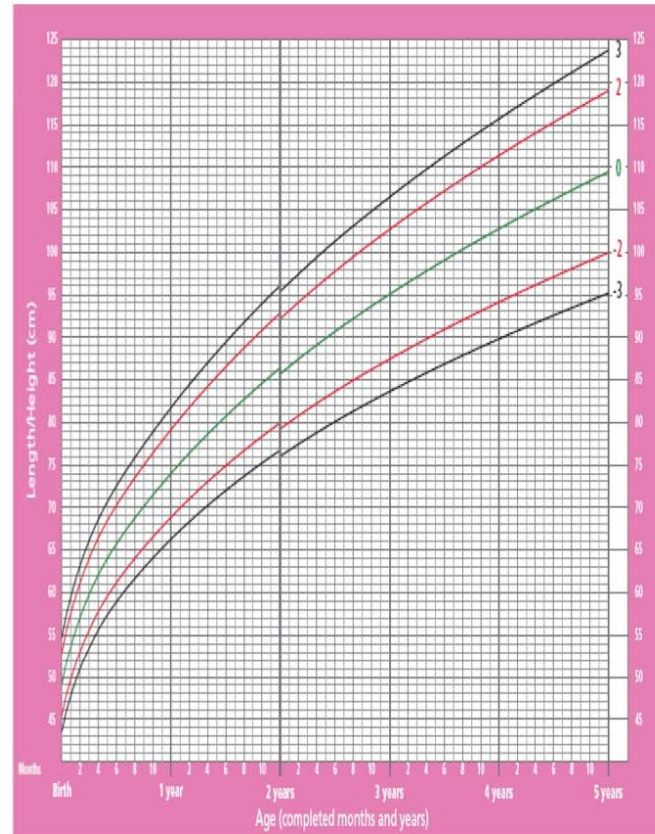

WHO Child Growth Standards

# Weight-for-age BOYS

Birth to 5 years (z-scores)

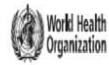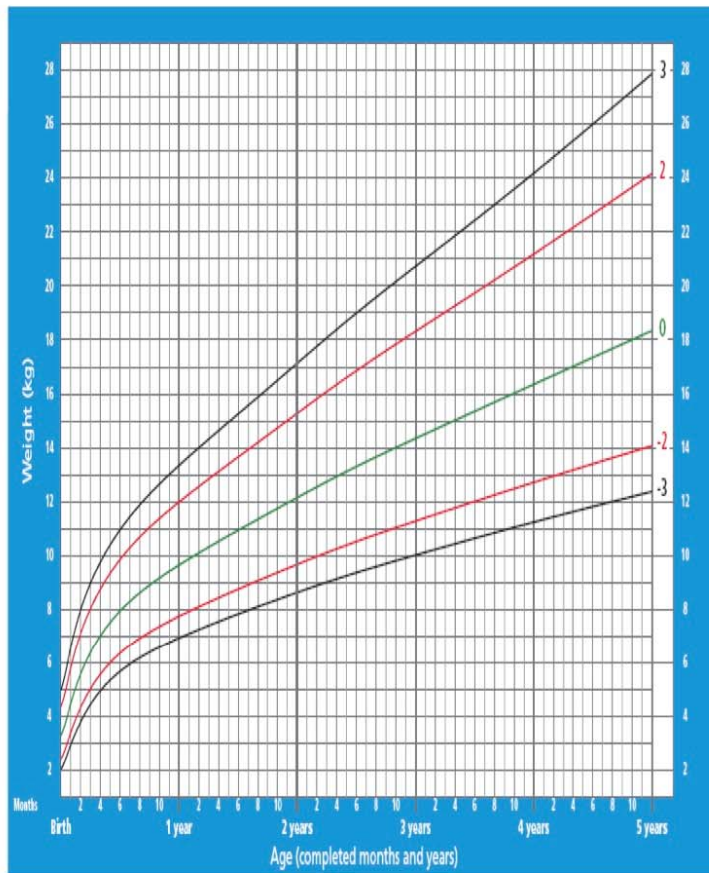

WHO Child Growth Standards

FMOH Logo

# Length/height-for-age BOYS

Birth to 5 years (z-scores)

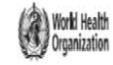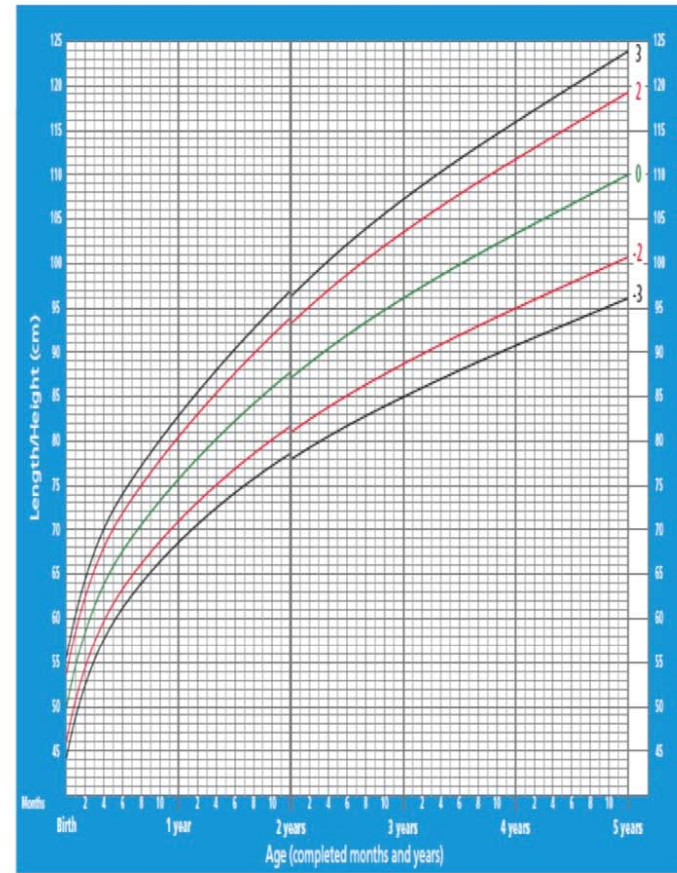

WHO Child Growth Standards

**Health Card Page 1**

Name: \_\_\_\_\_ DOB: \_\_\_\_\_ Individual ID: \_\_\_\_\_

Earlier health history:

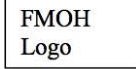

|  |
|--|
|  |
|  |
|  |
|  |

| <b>Disease information (Children &lt;5 yrs are listed with living mother)</b> |      |     |     |           |               |        |              |                   |              |        |
|-------------------------------------------------------------------------------|------|-----|-----|-----------|---------------|--------|--------------|-------------------|--------------|--------|
| Individual ID                                                                 | Date | Age | Sex | Diagnosis | Type of visit |        | Action taken | Setting (HP/Home) | Referred (√) | Remark |
|                                                                               |      |     |     |           | New           | Repeat |              |                   |              |        |
|                                                                               | / /  |     |     |           |               |        |              |                   |              |        |
|                                                                               | / /  |     |     |           |               |        |              |                   |              |        |
|                                                                               | / /  |     |     |           |               |        |              |                   |              |        |
|                                                                               | / /  |     |     |           |               |        |              |                   |              |        |
|                                                                               | / /  |     |     |           |               |        |              |                   |              |        |
|                                                                               | / /  |     |     |           |               |        |              |                   |              |        |
|                                                                               | / /  |     |     |           |               |        |              |                   |              |        |
|                                                                               | / /  |     |     |           |               |        |              |                   |              |        |
|                                                                               | / /  |     |     |           |               |        |              |                   |              |        |
|                                                                               | / /  |     |     |           |               |        |              |                   |              |        |
|                                                                               | / /  |     |     |           |               |        |              |                   |              |        |
|                                                                               | / /  |     |     |           |               |        |              |                   |              |        |
|                                                                               | / /  |     |     |           |               |        |              |                   |              |        |
|                                                                               | / /  |     |     |           |               |        |              |                   |              |        |
|                                                                               | / /  |     |     |           |               |        |              |                   |              |        |
|                                                                               | / /  |     |     |           |               |        |              |                   |              |        |
|                                                                               | / /  |     |     |           |               |        |              |                   |              |        |
|                                                                               | / /  |     |     |           |               |        |              |                   |              |        |

| <b>Referral information</b> |                     |                  |           |                         |        |
|-----------------------------|---------------------|------------------|-----------|-------------------------|--------|
| Individual ID               | Reason for referral | Date of referral | Feed back | Date feed back received | Remark |
|                             |                     | / /              |           | / /                     |        |
|                             |                     | / /              |           | / /                     |        |
|                             |                     | / /              |           | / /                     |        |
|                             |                     | / /              |           | / /                     |        |
|                             |                     | / /              |           | / /                     |        |
|                             |                     | / /              |           | / /                     |        |
|                             |                     | / /              |           | / /                     |        |
|                             |                     | / /              |           | / /                     |        |
|                             |                     | / /              |           | / /                     |        |
|                             |                     | / /              |           | / /                     |        |

**N.B. Use the card independently for >= 5yrs and for < 5yrs who lost their mother**

FMOH Ver 1/01

Health Card Page 2

| Disease information (Children <5 yrs are listed with living mother) |      |     |     |           |               |        |              |                    |              |        |
|---------------------------------------------------------------------|------|-----|-----|-----------|---------------|--------|--------------|--------------------|--------------|--------|
| Individual ID                                                       | Date | Age | Sex | Diagnosis | Type of visit |        | Action taken | Setting (HP/ Home) | Referred (v) | Remark |
|                                                                     |      |     |     |           | New           | Repeat |              |                    |              |        |
|                                                                     | / /  |     |     |           |               |        |              |                    |              |        |
|                                                                     | / /  |     |     |           |               |        |              |                    |              |        |
|                                                                     | / /  |     |     |           |               |        |              |                    |              |        |
|                                                                     | / /  |     |     |           |               |        |              |                    |              |        |
|                                                                     | / /  |     |     |           |               |        |              |                    |              |        |
|                                                                     | / /  |     |     |           |               |        |              |                    |              |        |
|                                                                     | / /  |     |     |           |               |        |              |                    |              |        |
|                                                                     | / /  |     |     |           |               |        |              |                    |              |        |
|                                                                     | / /  |     |     |           |               |        |              |                    |              |        |
|                                                                     | / /  |     |     |           |               |        |              |                    |              |        |
|                                                                     | / /  |     |     |           |               |        |              |                    |              |        |
|                                                                     | / /  |     |     |           |               |        |              |                    |              |        |
|                                                                     | / /  |     |     |           |               |        |              |                    |              |        |
|                                                                     | / /  |     |     |           |               |        |              |                    |              |        |
|                                                                     | / /  |     |     |           |               |        |              |                    |              |        |
|                                                                     | / /  |     |     |           |               |        |              |                    |              |        |
|                                                                     | / /  |     |     |           |               |        |              |                    |              |        |
|                                                                     | / /  |     |     |           |               |        |              |                    |              |        |
|                                                                     | / /  |     |     |           |               |        |              |                    |              |        |
|                                                                     | / /  |     |     |           |               |        |              |                    |              |        |
|                                                                     | / /  |     |     |           |               |        |              |                    |              |        |
|                                                                     | / /  |     |     |           |               |        |              |                    |              |        |

| Referral information |                     |                  |           |                         |        |
|----------------------|---------------------|------------------|-----------|-------------------------|--------|
| Individual ID        | Reason for referral | Date of referral | Feed back | Date feed back received | Remark |
|                      |                     | / /              |           | / /                     |        |
|                      |                     | / /              |           | / /                     |        |
|                      |                     | / /              |           | / /                     |        |
|                      |                     | / /              |           | / /                     |        |
|                      |                     | / /              |           | / /                     |        |
|                      |                     | / /              |           | / /                     |        |
|                      |                     | / /              |           | / /                     |        |
|                      |                     | / /              |           | / /                     |        |
|                      |                     | / /              |           | / /                     |        |
|                      |                     | / /              |           | / /                     |        |
|                      |                     | / /              |           | / /                     |        |
|                      |                     | / /              |           | / /                     |        |
|                      |                     | / /              |           | / /                     |        |
|                      |                     | / /              |           | / /                     |        |
|                      |                     | / /              |           | / /                     |        |
|                      |                     | / /              |           | / /                     |        |
|                      |                     | / /              |           | / /                     |        |
|                      |                     | / /              |           | / /                     |        |
|                      |                     | / /              |           | / /                     |        |
|                      |                     | / /              |           | / /                     |        |
|                      |                     | / /              |           | / /                     |        |
|                      |                     | / /              |           | / /                     |        |
|                      |                     | / /              |           | / /                     |        |

N.B. Use the card independently for >= 5yrs and for < 5yrs who lost their mother

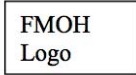

**HIV/AIDS**

| Individual ID | Date     | Currently on medication (ART) (Y/N) | Properly taking ART (Y/N) | Any related health problem identified | Remark |
|---------------|----------|-------------------------------------|---------------------------|---------------------------------------|--------|
|               | __/__/__ |                                     |                           |                                       |        |
|               | __/__/__ |                                     |                           |                                       |        |
|               | __/__/__ |                                     |                           |                                       |        |
|               | __/__/__ |                                     |                           |                                       |        |
|               | __/__/__ |                                     |                           |                                       |        |
|               | __/__/__ |                                     |                           |                                       |        |
|               | __/__/__ |                                     |                           |                                       |        |
|               | __/__/__ |                                     |                           |                                       |        |
|               | __/__/__ |                                     |                           |                                       |        |
|               | __/__/__ |                                     |                           |                                       |        |
|               | __/__/__ |                                     |                           |                                       |        |
|               | __/__/__ |                                     |                           |                                       |        |
|               | __/__/__ |                                     |                           |                                       |        |
|               | __/__/__ |                                     |                           |                                       |        |
|               | __/__/__ |                                     |                           |                                       |        |
|               | __/__/__ |                                     |                           |                                       |        |
|               | __/__/__ |                                     |                           |                                       |        |
|               | __/__/__ |                                     |                           |                                       |        |
|               | __/__/__ |                                     |                           |                                       |        |
|               | __/__/__ |                                     |                           |                                       |        |

**Tuberculosis**

| Individual ID | Date medication Started | Date     | Any related health problem identified | Action taken | Date medication completed | Remark   |  |
|---------------|-------------------------|----------|---------------------------------------|--------------|---------------------------|----------|--|
|               |                         | __/__/__ |                                       |              |                           |          |  |
|               |                         | __/__/__ |                                       |              |                           |          |  |
|               |                         | __/__/__ |                                       |              |                           |          |  |
|               |                         | __/__/__ |                                       |              |                           |          |  |
|               |                         | __/__/__ |                                       |              |                           |          |  |
|               |                         | __/__/__ |                                       |              |                           | __/__/__ |  |
|               |                         | __/__/__ |                                       |              |                           |          |  |
|               |                         | __/__/__ |                                       |              |                           |          |  |
|               |                         | __/__/__ |                                       |              |                           |          |  |
|               |                         | __/__/__ |                                       |              |                           |          |  |
|               |                         | __/__/__ |                                       |              |                           | __/__/__ |  |
|               |                         | __/__/__ |                                       |              |                           |          |  |
|               |                         | __/__/__ |                                       |              |                           |          |  |
|               |                         | __/__/__ |                                       |              |                           |          |  |
|               |                         | __/__/__ |                                       |              |                           |          |  |
|               |                         | __/__/__ |                                       |              |                           | __/__/__ |  |
|               |                         | __/__/__ |                                       |              |                           |          |  |
|               |                         | __/__/__ |                                       |              |                           |          |  |
|               |                         | __/__/__ |                                       |              |                           |          |  |
|               |                         | __/__/__ |                                       |              |                           |          |  |



Health card Page 4

Name: \_\_\_\_\_ DOB: \_\_\_\_\_ Individual ID: \_\_\_\_\_

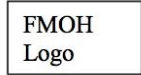

**Family planning**

|    | Description              | Visit - 1 | Visit - 2 | Visit - 3 | Visit - 4 | Visit - 5 | Visit - 6 |
|----|--------------------------|-----------|-----------|-----------|-----------|-----------|-----------|
| 1  | New/ Repeat              |           |           |           |           |           |           |
| 2  | Visit Date               | ///       | ///       | ///       | ///       | ///       | ///       |
| 3  | LMP                      | ///       | ///       | ///       | ///       | ///       | ///       |
| 4  | BP                       |           |           |           |           |           |           |
| 5  | Weight                   |           |           |           |           |           |           |
| 6  | Method                   |           |           |           |           |           |           |
| 7  | Amount given             |           |           |           |           |           |           |
| 8  | Reason for method switch |           |           |           |           |           |           |
| 9  | Reason for referral      |           |           |           |           |           |           |
| 10 | Next visit               | ///       | ///       | ///       | ///       | ///       | ///       |

  

|    | Description              | Visit - 7 | Visit - 8 | Visit - 9 | Visit - 10 | Visit - 11 | Visit - 12 |
|----|--------------------------|-----------|-----------|-----------|------------|------------|------------|
| 1  | New/Repeat               |           |           |           |            |            |            |
| 2  | Visit Date               | ///       | ///       | ///       | ///        | ///        | ///        |
| 3  | LMP                      | ///       | ///       | ///       | ///        | ///        | ///        |
| 4  | BP                       |           |           |           |            |            |            |
| 5  | Weight                   |           |           |           |            |            |            |
| 6  | Method                   |           |           |           |            |            |            |
| 7  | Amount given             |           |           |           |            |            |            |
| 8  | Reason for method switch |           |           |           |            |            |            |
| 9  | Reason for referral      |           |           |           |            |            |            |
| 10 | Next visit               | ///       | ///       | ///       | ///        | ///        | ///        |

**History of immunization**

| Individual ID | Antigen No  | BCG (Date) | Polio (Date) | Pentavalent (Date) | Measles (Date) | TT (Date) | Remarks |
|---------------|-------------|------------|--------------|--------------------|----------------|-----------|---------|
|               | 0           |            | ///          |                    |                | 1         | ///     |
|               | I           |            | ///          |                    |                | 2         | ///     |
|               | II          |            | ///          |                    |                | 3         | ///     |
|               | III         |            | ///          |                    |                | 4         | ///     |
|               | Single dose | ///        |              | ///                |                | 5         | ///     |

  

| Individual ID | Antigen No  | BCG (Date) | Polio (Date) | Pentavalent (Date) | Measles (Date) | TT (Date) | Remarks |
|---------------|-------------|------------|--------------|--------------------|----------------|-----------|---------|
|               | 0           |            | ///          |                    |                | 1         | ///     |
|               | I           |            | ///          |                    |                | 2         | ///     |
|               | II          |            | ///          |                    |                | 3         | ///     |
|               | III         |            | ///          |                    |                | 4         | ///     |
|               | Single dose | ///        |              | ///                |                | 5         | ///     |

**Height and weight**

| Individual ID | Date | Weight | Height | Remarks | Individual ID | Date | Weight | Height | Remarks |
|---------------|------|--------|--------|---------|---------------|------|--------|--------|---------|
|               |      |        |        |         |               |      |        |        |         |
|               |      |        |        |         |               |      |        |        |         |
|               |      |        |        |         |               |      |        |        |         |
|               |      |        |        |         |               |      |        |        |         |

**Orphan [When orphan is identified]**

| Individual ID | Age | Supports            | Support received*       |    |      |                         |    |      | Remarks |
|---------------|-----|---------------------|-------------------------|----|------|-------------------------|----|------|---------|
|               |     |                     | 1 <sup>st</sup> contact |    | Date | 2 <sup>nd</sup> contact |    | Date |         |
|               |     |                     | Yes                     | No |      | Yes                     | No |      |         |
|               |     | Educational support |                         |    | ///  |                         |    | ///  |         |
|               |     | Food support        |                         |    | ///  |                         |    | ///  |         |
|               |     | Shelter support     |                         |    | ///  |                         |    | ///  |         |
|               |     | IGA support         |                         |    | ///  |                         |    | ///  |         |
|               |     | Educational support |                         |    | ///  |                         |    | ///  |         |
|               |     | Food support        |                         |    | ///  |                         |    | ///  |         |
|               |     | Shelter support     |                         |    | ///  |                         |    | ///  |         |
|               |     | IGA support         |                         |    | ///  |                         |    | ///  |         |

\* Document "Yes" or "No" based on the support received and put the date of support for orphans <15yrs.

**RAPID MORTALITY MONITORING  
HOUSEHOLD LISTING EXTRACTION FORM**  
JOHNS HOPKINS UNIVERSITY – MIZ HASAB RESERCH CENTER

|                      |                             |
|----------------------|-----------------------------|
| Woreda: .....        | Kebele name: .....          |
| HEALTH FACILITY NAME | HEALTH FACILITY CODE: ..... |
| NAME OF HEW 1: ..... | MONTH & YEAR: .....         |
| NAME OF HEW 2: ..... | Household ID number: .....  |

**SCHEDULE A: HOUSEHOLD LISTING**

| LINE NO | ID NO OF PERSON FROM FAMILY FOLDER      | SEX   | DATE OF BIRTH<br>DD/MM/YYYY | AGE   | RELATIONSHIP WITH HEAD |
|---------|-----------------------------------------|-------|-----------------------------|-------|------------------------|
| (A01)   | (A02)                                   | (A03) | (A04)                       | (A05) | (A06)                  |
|         | HEAD.....1                              |       |                             |       |                        |
|         | WIFE/HUSBAND.....2                      | M F   |                             |       |                        |
|         | CHILD/ADOPTED CHILD.....3               |       |                             |       |                        |
|         | GRANDCHILD.....4                        | M F   |                             |       |                        |
|         | NIECE/NEPHEW.....5                      |       |                             |       |                        |
|         | FATHER/MOTHER.....6                     |       |                             |       |                        |
|         | SISTER/BROTHER.....7                    | M F   |                             |       |                        |
|         | SON/DAUGHTER-IN-LAW.....8               |       |                             |       |                        |
|         | BROTHER/SISTER-IN-LAW.....9             | M F   |                             |       |                        |
|         | GRANDFATHER/MOTHER.....10               |       |                             |       |                        |
|         | FATHER/MOTHER-IN-LAW.....11             | M F   |                             |       |                        |
|         | OTHER RELATIVE.....12                   |       |                             |       |                        |
|         | SERVANT OR SERVANT'S<br>RELATIVE.....13 | M F   |                             |       |                        |
|         | LODGER/LODGER'S<br>RELATIVE.....14      | M F   |                             |       |                        |
|         | OTHER NON-RELATIVE.....15               |       |                             |       |                        |
|         | OTHER (SPECIFY).....16                  | M F   |                             |       |                        |
| 9       |                                         | M F   |                             |       |                        |
| 10      |                                         | M F   |                             |       |                        |

CODES FOR RELATIONSHIP WITH HEAD

**RAPID MORTALITY MONITORING**  
**MONTHLY HEWs RECORDING OF VITAL EVENTS EXTRACTION FORM**  
 JOHNS HOPKINS UNIVERSITY – MIZ HASAB RESERCH CENTER

|                             |                             |
|-----------------------------|-----------------------------|
| Zone:.....Woreda.....       | Kebele name: .....          |
| HEALTH FACILITY NAME: ..... | HEALTH FACILITY CODE: ..... |
| NAME OF HEW 1: .....        | MONTH & YEAR: .....         |
| NAME OF HEW 2: .....        |                             |

**SCHEDULE B: PREGNANCIES**

| LINE NO<br>(B01) | HH ID NO OF WOMAN<br>FROM FAMILY FOLDER<br>(B02) | ID NO OF WOMAN FROM<br>FAMILY FOLDER<br>(B03) | AGE<br>(B04) | LMP (month & year)<br>(B05) | GESTATION IN<br>MONTHS<br>(B06) | *Pregnancy Outcome<br>(B07) | COMENT IF<br>NECESSARY<br>(B08) |
|------------------|--------------------------------------------------|-----------------------------------------------|--------------|-----------------------------|---------------------------------|-----------------------------|---------------------------------|
| 1                |                                                  |                                               |              | -- / -- --                  |                                 |                             |                                 |
| 2                |                                                  |                                               |              | -- / -- --                  |                                 |                             |                                 |
| 3                |                                                  |                                               |              | -- / -- --                  |                                 |                             |                                 |
| 4                |                                                  |                                               |              | -- / -- --                  |                                 |                             |                                 |
| 5                |                                                  |                                               |              | -- / -- --                  |                                 |                             |                                 |
| 6                |                                                  |                                               |              | -- / -- --                  |                                 |                             |                                 |
| 7                |                                                  |                                               |              | -- / -- --                  |                                 |                             |                                 |
| 8                |                                                  |                                               |              | -- / -- --                  |                                 |                             |                                 |
| 9                |                                                  |                                               |              | -- / -- --                  |                                 |                             |                                 |
| 10               |                                                  |                                               |              | -- / -- --                  |                                 |                             |                                 |
| 11               |                                                  |                                               |              | -- / -- --                  |                                 |                             |                                 |
| 12               |                                                  |                                               |              | -- / -- --                  |                                 |                             |                                 |
| 13               |                                                  |                                               |              | -- / -- --                  |                                 |                             |                                 |
| 14               |                                                  |                                               |              | -- / -- --                  |                                 |                             |                                 |
| 15               |                                                  |                                               |              | -- / -- --                  |                                 |                             |                                 |

\*Please indicate if pregnancy outcome is 1. Abortion 2. Miscarriage and 3. Stillbirth

**SCHEDULE C: BIRTHS, Record only live births**

| <b>LINE NO</b><br><br><b>(C01)</b> | <b>HH ID NO OF CHILD MOTHER FROM FAMILY FOLDER</b><br><b>(C02)</b> | <b>ID NO OF CHILD MOTHER FROM FAMILY FOLDER</b><br><b>(C03)</b> | <b>SEX OF CHILD</b><br><br><b>(C04)</b> | <b>DATE OF BIRTH</b><br><br><b>DD/MM/YYYY</b><br><br><b>(C05)</b> | <b>PLACE OF BIRTH</b><br>Home With TBA=1<br><br>Home w/out TBA=2<br>H/C=3<br>Hospital=4<br>Other=5__<br><b>(C06)</b> | <b>COMMENT IF NECESSARY</b><br><b>(C07)</b> |
|------------------------------------|--------------------------------------------------------------------|-----------------------------------------------------------------|-----------------------------------------|-------------------------------------------------------------------|----------------------------------------------------------------------------------------------------------------------|---------------------------------------------|
| 1                                  |                                                                    |                                                                 | M F                                     | -- / -- / -----                                                   |                                                                                                                      |                                             |
| 2                                  |                                                                    |                                                                 | M F                                     | -- / -- / -----                                                   |                                                                                                                      |                                             |
| 3                                  |                                                                    |                                                                 | M F                                     | -- / -- / -----                                                   |                                                                                                                      |                                             |
| 4                                  |                                                                    |                                                                 | M F                                     | -- / -- / -----                                                   |                                                                                                                      |                                             |
| 5                                  |                                                                    |                                                                 | M F                                     | -- / -- / -----                                                   |                                                                                                                      |                                             |
| 6                                  |                                                                    |                                                                 | M F                                     | -- / -- / -----                                                   |                                                                                                                      |                                             |
| 7                                  |                                                                    |                                                                 | M F                                     | -- / -- / -----                                                   |                                                                                                                      |                                             |
| 8                                  |                                                                    |                                                                 | M F                                     | -- / -- / -----                                                   |                                                                                                                      |                                             |
| 9                                  |                                                                    |                                                                 | M F                                     | -- / -- / -----                                                   |                                                                                                                      |                                             |
| 10                                 |                                                                    |                                                                 | M F                                     | -- / -- / -----                                                   |                                                                                                                      |                                             |
| 11                                 |                                                                    |                                                                 | M F                                     | -- / -- / -----                                                   |                                                                                                                      |                                             |

**SCHEDULE D: DEATHS**

| LINE NO | HH ID NO OF PERSON FROM FAMILY FOLDER | *ID NO OF PERSON FROM FAMILY FOLDER | DATE OF BIRTH<br>DD/MM/YYYY | SEX    | DATE OF DEATH<br>DD/MM/YYYY | AGE** | AGE GROUP<br><br>< 1yr = 1<br>1-4yrs = 2<br>≥ 5yrs = 3 | PLACE OF DEATH<br><br>(If health facility, write name) | REPORTED CAUSE OF DEATH | NOTE: ASK THE FOLLOWING FOR DEATHS OF WOMEN AGED 12 YEARS + TO PROBE IF MATERNAL DEATH |                                                          |                                                                       |
|---------|---------------------------------------|-------------------------------------|-----------------------------|--------|-----------------------------|-------|--------------------------------------------------------|--------------------------------------------------------|-------------------------|----------------------------------------------------------------------------------------|----------------------------------------------------------|-----------------------------------------------------------------------|
|         |                                       |                                     |                             |        |                             |       |                                                        |                                                        |                         | Was (PERSON) Pregnant when she died?<br><br>Yes=1<br>No=2                              | Did (PERSON) die during Childbirth?<br><br>Yes=1<br>No=2 | Did (PERSON) die within 2 months after delivery?<br><br>Yes=1<br>No=2 |
| (D01)   | (D02)                                 | (D03)                               | (D04)                       | (D05)  | (D06)                       | (D07) | (D08)                                                  | (D08)                                                  | (D09)                   | (D10)                                                                                  | (D11)                                                    | (D12)                                                                 |
| 1       |                                       |                                     | --/--/----                  | M<br>F | --/--/----                  |       |                                                        |                                                        |                         |                                                                                        |                                                          |                                                                       |
| 2       |                                       |                                     | --/--/----                  | M<br>F | --/--/----                  |       |                                                        |                                                        |                         |                                                                                        |                                                          |                                                                       |
| 3       |                                       |                                     | --/--/----                  | M<br>F | --/--/----                  |       |                                                        |                                                        |                         |                                                                                        |                                                          |                                                                       |
| 4       |                                       |                                     | --/--/----                  | M<br>F | --/--/----                  |       |                                                        |                                                        |                         |                                                                                        |                                                          |                                                                       |
| 5       |                                       |                                     | --/--/----                  | M<br>F | --/--/----                  |       |                                                        |                                                        |                         |                                                                                        |                                                          |                                                                       |

\*\* Include age at death in days if less than one month, in months if less than two years and in years if more than two years. In case age at death is in days or in months, please write days or months in brackets.

\*If NND and no ID number is given to child, please use mothers ID

**Real Time MORTALITY MONITORING  
HEW RECORDING OF VITAL EVENTS DATA COLLECTION FORM  
JOHNS HOPKINS UNIVERSITY – MIZ HASAB RESERCH CENTER**

**Data Collection Form**

|                                    |                      |                                    |
|------------------------------------|----------------------|------------------------------------|
| <b>Zone:</b> .....                 | <b>Woreda:</b> ..... | <b>Kebele name:</b> .....          |
| <b>HEALTH FACILITY NAME:</b> ..... |                      | <b>HEALTH FACILITY CODE:</b> ..... |
| <b>NAME OF HEW 1:</b> .....        |                      | <b>MONTH &amp; YEAR:</b> .....     |
| <b>2:</b> .....                    |                      |                                    |

**SCHEDULE B: BIRTHS, *Record only live births***

| LINE NO | HH ID NO OF CHILD MOTHER FROM FAMILY FOLDER | ID NO OF CHILD MOTHER FROM FAMILY FOLDER | SEX OF CHILD | DATE OF BIRTH DD/MM/YYYY | PLACE OF BIRTH<br>Home TBA=1<br>Home no TBA=2<br>H/C=3<br>Hospital=4<br>Other=5 | COMMENT IF NECESSARY |
|---------|---------------------------------------------|------------------------------------------|--------------|--------------------------|---------------------------------------------------------------------------------|----------------------|
| (B01)   | (B02)                                       | (B03)                                    | (B04)        | (B05)                    | (B06)                                                                           | (B07)                |
|         |                                             |                                          | M    F       | -- / -- / ----           |                                                                                 |                      |
|         |                                             |                                          | M    F       | -- / -- / ----           |                                                                                 |                      |

**Real Time MORTALITY MONITORING  
MONTHLY HEW RECORDING OF VITAL EVENTS EXTRACTION FORM  
JOHNS HOPKINS UNIVERSITY – MIZ HASAB RESERCH CENTER**

**Extraction Form**

|                                  |                                |
|----------------------------------|--------------------------------|
| Woreda: .....                    | Kebele name:<br>.....          |
| HEALTH FACILITY NAME: .....      | HEALTH FACILITY CODE:<br>..... |
| NAME OF HEW 1: .....<br>2: ..... | MONTH & YEAR:<br>.....         |

**SCHEDULE B: BIRTHS, *Record only live births***

| LINE NO | HH ID NO OF CHILD MOTHER FROM FAMILY FOLDER | ID NO OF CHILD MOTHER FROM FAMILY FOLDER | SEX OF CHILD | DATE OF BIRTH DD/MM/YYYY | PLACE OF BIRTH<br>Home TBA=1<br>Home no TBA=2<br>H/C=3<br>Hospital=4<br>Other=5 | COMMENT IF NECESSARY |
|---------|---------------------------------------------|------------------------------------------|--------------|--------------------------|---------------------------------------------------------------------------------|----------------------|
| (B01)   | (B02)                                       | (B03)                                    | (B04)        | (B05)                    | (B06)                                                                           | (B07)                |
| 01      |                                             |                                          | M    F       | -- / -- / ----           |                                                                                 |                      |
| 02      |                                             |                                          | M    F       | -- / -- / ----           |                                                                                 |                      |
| 03      |                                             |                                          | M    F       | -- / -- / ----           |                                                                                 |                      |
| 04      |                                             |                                          | M    F       | -- / -- / ----           |                                                                                 |                      |
| 05      |                                             |                                          | M    F       | -- / -- / ----           |                                                                                 |                      |
| 06      |                                             |                                          | M    F       | -- / -- / ----           |                                                                                 |                      |

**Real Time MORTALITY MONITORING  
HEW RECORDING OF VITAL EVENTS DATA COLLECTION FORM  
JOHNS HOPKINS UNIVERSITY – MIZ HASAB RESERCH CENTER**

**Data Collection Form**

|                                  |                             |
|----------------------------------|-----------------------------|
| Woreda: .....                    | Kebele name: .....          |
| HEALTH FACILITY NAME: .....      | HEALTH FACILITY CODE: ..... |
| NAME OF HEW 1: .....<br>2: ..... | MONTH & YEAR: .....         |

**SCHEDULE B: PREGNANCIES**

| LINE NO | HH ID NO. OF WOMAN FROM FAMILY FOLDER | ID NO OF WOMAN FROM FAMILY FOLDER | AGE    | LMP (month & year) | GESTATION IN MONTHS | PREGNANCY OUTCOME * | COMENT IF NECESSARY |
|---------|---------------------------------------|-----------------------------------|--------|--------------------|---------------------|---------------------|---------------------|
| (A 01)  | (A02)                                 | (A 03)                            | (A 04) | (A 05)             | (A 06)              | (A07)               | (A 07)              |
|         |                                       |                                   |        | __ / ____          |                     |                     |                     |
|         |                                       |                                   |        | __ / ____          |                     |                     |                     |

\*Please indicate if pregnancy outcome is 1. Abortion 2. Miscarriage and 3. Stillbirth



**Real Time MORTALITY MONITORING**  
**MONTHLY HEW RECORDING OF VITAL EVENTS EXTRACTION FORM**  
JOHNS HOPKINS UNIVERSITY – MIZ HASAB RESERCH CENTER

**Extraction Form**

|                                  |                             |
|----------------------------------|-----------------------------|
| Zone: .....Woreda:.....          | Kebele name: .....          |
| HEALTH FACILITY NAME: .....      | HEALTH FACILITY CODE: ..... |
| NAME OF HEW 1: .....<br>2: ..... | MONTH & YEAR: .....         |

**SCHEDULE B: PREGNANCIES**

| LINE NO | HH ID NO OF WOMAN FROM FAMILY FOLDER | ID NO OF WOMAN FROM FAMILY FOLDER | AGE    | LMP (month & year) | GESTATION IN MONTHS | PREGNANCY OUTCOME * | COMENT IF NECESSARY |
|---------|--------------------------------------|-----------------------------------|--------|--------------------|---------------------|---------------------|---------------------|
| (A 01)  | (A 02)                               | (A 03)                            | (A 04) | (A 05)             | (A 06)              | (A07)               | (A 08)              |
|         |                                      |                                   |        | _ _ / _ _ _ _      |                     |                     |                     |
|         |                                      |                                   |        | _ _ / _ _ _ _      |                     |                     |                     |
|         |                                      |                                   |        | _ _ / _ _ _ _      |                     |                     |                     |
|         |                                      |                                   |        | _ _ / _ _ _ _      |                     |                     |                     |
|         |                                      |                                   |        | _ _ / _ _ _ _      |                     |                     |                     |
|         |                                      |                                   |        | _ _ / _ _ _ _      |                     |                     |                     |
|         |                                      |                                   |        | _ _ / _ _ _ _      |                     |                     |                     |
|         |                                      |                                   |        | _ _ / _ _ _ _      |                     |                     |                     |
|         |                                      |                                   |        | _ _ / _ _ _ _      |                     |                     |                     |
|         |                                      |                                   |        | _ _ / _ _ _ _      |                     |                     |                     |
|         |                                      |                                   |        | _ _ / _ _ _ _      |                     |                     |                     |
|         |                                      |                                   |        | _ _ / _ _ _ _      |                     |                     |                     |
|         |                                      |                                   |        | _ _ / _ _ _ _      |                     |                     |                     |
|         |                                      |                                   |        | _ _ / _ _ _ _      |                     |                     |                     |
|         |                                      |                                   |        | _ _ / _ _ _ _      |                     |                     |                     |
|         |                                      |                                   |        | _ _ / _ _ _ _      |                     |                     |                     |

\*Please indicate if pregnancy outcome is 1. Abortion 2. Miscarriage and 3. Stillbirth

**Real Time MORTALITY MONITORING**  
**HEW RECORDING OF VITAL EVENTS DATA COLLECTION FORM**  
 JOHNS HOPKINS UNIVERSITY – MIZ HASAB RESERCH CENTER

**Data Collection Form**

|                                  |                             |
|----------------------------------|-----------------------------|
| Zone: .....Woreda:.....          | Kebele name: .....          |
| HEALTH FACILITY NAME: .....      | HEALTH FACILITY CODE: ..... |
| NAME OF HEW 1: .....<br>2: ..... | MONTH & YEAR: .....         |

**SCHEDULE C: DEATHS**

| LINE NO | HH ID NO OF PERSON FROM FAMILY FOLDER | ID NO OF PERSON FROM FAMILY FOLDER** | DATE OF BIRTH<br>DD/MM/YYYY | SEX    | DATE OF DEATH<br>DD/MM/YYYY | AGE*  | PLACE OF DEATH<br><br><i>(If health facility, write name)</i> | REPORTED CAUSE OF DEATH | <i>NOTE: ASK THE FOLLOWING FOR DEATHS OF WOMEN AGED 12 YEARS + TO PROBE IF MATERNAL DEATH</i> |                                                          |                                                                   |
|---------|---------------------------------------|--------------------------------------|-----------------------------|--------|-----------------------------|-------|---------------------------------------------------------------|-------------------------|-----------------------------------------------------------------------------------------------|----------------------------------------------------------|-------------------------------------------------------------------|
|         |                                       |                                      |                             |        |                             |       |                                                               |                         | Was (PERSON) Pregnant when she died?<br><br>Yes=1<br>No=2                                     | Did (PERSON) die during Childbirth?<br><br>Yes=1<br>No=2 | Did (PERSON) die within 2 months after delivery?<br>Yes=1<br>No=2 |
| (C01)   | (C 02)                                | (C 03)                               | (C 04)                      | (C 05) | (C 06)                      | (C07) | (C 08)                                                        | (C 09)                  | (C 10)                                                                                        | (C 11)                                                   | (c 12)                                                            |
|         |                                       |                                      | __/__/__                    | M F    | __/__/__                    |       |                                                               |                         |                                                                                               |                                                          |                                                                   |
|         |                                       |                                      | __/__/__                    | M F    | __/__/__                    |       |                                                               |                         |                                                                                               |                                                          |                                                                   |

\*Include age at death in days if less than one month, in months if less than two years and in years if more than two years. In case age at death is in days or in months, please write days or months in brackets.

\*\*If NND and no ID number is given to child, please use mothers ID

**Real Time MORTALITY MONITORING**

# MONTHLY HEW RECORDING OF VITAL EVENTS EXTRACTION FORM

JOHNS HOPKINS UNIVERSITY – MIZ HASAB RESERCH CENTER

## Extraction Form

|                                  |                             |
|----------------------------------|-----------------------------|
| Woreda: .....                    | Kebele name: .....          |
| HEALTH FACILITY NAME: .....      | HEALTH FACILITY CODE: ..... |
| NAME OF HEW 1: .....<br>2: ..... | MONTH & YEAR: .....         |
|                                  | Household ID number: .....  |

### SCHEDULE C: DEATHS

| LINE NO | HH ID NO OF PERSON FROM FAMILY FOLDER | ID NO OF PERSON FROM FAMILY FOLDER** | DATE OF BIRTH<br>DD/MM/YYYY | SEX    | DATE OF DEATH<br>DD/MM/YYYY | AGE*  | PLACE OF DEATH<br><br><i>(If health facility, write name)</i> | REPORTED CAUSE OF DEATH | <i>NOTE: ASK THE FOLLOWING FOR DEATHS OF WOMEN AGED 12 YEARS + TO PROBE IF MATERNAL DEATH</i> |                                                          |                                                                   |
|---------|---------------------------------------|--------------------------------------|-----------------------------|--------|-----------------------------|-------|---------------------------------------------------------------|-------------------------|-----------------------------------------------------------------------------------------------|----------------------------------------------------------|-------------------------------------------------------------------|
|         |                                       |                                      |                             |        |                             |       |                                                               |                         | Was (PERSON) Pregnant when she died?<br><br>Yes=1<br>No=2                                     | Did (PERSON) die during Childbirth?<br><br>Yes=1<br>No=2 | Did (PERSON) die within 2 months after delivery?<br>Yes=1<br>No=2 |
| (C01)   | (C 02)                                | (C 03)                               | (C 04)                      | (C 05) | (C 06)                      | (C07) | (C 08)                                                        | (C 09)                  | (C 10)                                                                                        | (C 11)                                                   | (c 12)                                                            |
| 01      |                                       |                                      | __/__/__                    | M F    | __/__/__                    |       |                                                               |                         |                                                                                               |                                                          |                                                                   |
| 02      |                                       |                                      | __/__/__                    | M F    | __/__/__                    |       |                                                               |                         |                                                                                               |                                                          |                                                                   |
| 03      |                                       |                                      | __/__/__                    | M F    | __/__/__                    |       |                                                               |                         |                                                                                               |                                                          |                                                                   |
| 04      |                                       |                                      | __/__/__                    | M F    | __/__/__                    |       |                                                               |                         |                                                                                               |                                                          |                                                                   |
| 05      |                                       |                                      | __/__/__                    | M F    | __/__/__                    |       |                                                               |                         |                                                                                               |                                                          |                                                                   |

*\*Include age at death in days if less than one month, in months if less than two years and in years if more than two years. In case age at death is in days or in months, please write days or months in brackets. \*\*If NND and no ID number is given to child, please use mothers ID*

**CHECKED BY::** ..... **SIGNATURE** ..... **DATE** .....

**Real Time MORTALITY MONITORING  
MONTHLY HEW RECORDING OF VITAL EVENTS DATA  
COLLECTION FORM**

JOHNS HOPKINS UNIVERSITY – MIZ HASAB RESERCH CENTER

**መረጃ መሰብሰቢያ ቅጽ**

**Guca odeeffannoon ittiin sasaabamu**

|                        |           |                         |
|------------------------|-----------|-------------------------|
| ዞን .....               | ወረዳ ..... | የቀበሌው ስም .....          |
| Godina                 | Aanaa     | Maqaa gandaa            |
| የጤና ተቋም ስም .....       |           | የጤና ተቋም መለያ ቁጥር .....   |
| Maqaa dhaabata fayyaa  |           | Koodii dhaabbata fayyaa |
| የጤና ኤክስፔንሽን ስም 1. .... |           | ወር እና ዓ.ም. ....         |
| Maqaa hojjetu 2. ....  |           | Ji'aa fii bara          |
| ekisteenshinii fayyaa  |           |                         |

**ክፍል ሀ: እርግዝና**

**Kutaa A: Ulfa**

| ተ.ቁ<br>Lakk | የነፍስ ጡሯ የቤተሰብ መለያ ቁ. ከቤተሰብ ማህደር<br>Koodii maatii dubartii ulfaa galmmee maatii keessaa | የነፍስ ጡሯ መለያ ቁ. ከቤተሰብ ማህደር<br>Koodii dubartii ulfaa galmmee matii keessaa | ዕድሜ<br>Umurii | የመጨረሻ የወር አበባ የታየበት ወር እና ዓ.ም.<br>Guyyaa dhumaa adafiin itti mul'ate yoomi? | አሁን የሰንት ወር ነፍስ ጡር ነሽ<br>Amma ulfa ji'a meeqati | * <input type="checkbox"/> እርግዝና ወጤት<br>* Bu'aa ulfichaa | አስተያየት ካለ<br>Yaada (yoojiraate) |
|-------------|----------------------------------------------------------------------------------------|--------------------------------------------------------------------------|---------------|-----------------------------------------------------------------------------|-------------------------------------------------|----------------------------------------------------------|---------------------------------|
| (ሀ 01)      | (ሀ 02)                                                                                 | (ሀ 03)                                                                   | (ሀ 04)        | (ሀ 05)                                                                      | (ሀ 06)                                          | (ሀ 07)                                                   | (ሀ 08)                          |
| 01          |                                                                                        |                                                                          |               | -- / -- --                                                                  |                                                 |                                                          |                                 |

\* እርግዝናዉ ወጤት 1. እርግዝናዉ የተቋረጠ(Abortio) 2. የጨነገፈ. (Miscarriage) 3. ሞተዉ የተወለዱ (Stillbirth) ከሆነ ይገለጽ::

\* Bu'aa ulfichaa 1. Ulfichi kan addaan cite 2. Kan irraa ba'e 3. Du'anii kan dhalatan yoota'e ibsi.

**Real Time MORTALITY MONITORING  
MONTHLY HSA RECORDING OF VITAL EVENTS EXTRACTION FORM  
JOHNS HOPKINS UNIVERSITY – MIZ HASAB RESERCH CENTER**

መረጃዎች ሁሉ መሰብሰቢያ ቅጽ  
Guca odeeffannoon ittiin sasaabamu

|                        |           |                         |
|------------------------|-----------|-------------------------|
| ዞን .....               | ወረዳ ..... | የቀበሌዊ ስም .....          |
| Godina                 | Aanaa     | Maqaa gandaa            |
| የጤና ተቋሙ ስም .....       |           | የጤና ተቋሙ መለያ ቁጥር .....   |
| Maqaa dhaabata fayyaa  |           | Koodii dhaabbata fayyaa |
| የጤና ኤክስቴንሽን ስም 1. .... |           | ወር እና ዓ.ም. ....         |
| Maqaa hojjetu 2. ....  |           | Ji'aa fii bara          |
| ekisteenshinii fayyaa  |           |                         |

**ክፍል ሀ: እርግዝናዎች**  
Kutaa A: Ulfa

| ተ.ቁ<br>Lakk | የነፍስ ጡሯ የቤተሰብ መለያ ቁ. ከቤተሰብ ማህደር<br>Koodii maatii dubartii ulfaa galmmee maatii keessaa | የነፍስ ጡሯ መለያ ቁ. ከቤተሰብ ማህደር<br>Koodii dubartii ulfaa galmmee matii keessaa | ዕድሜ<br>Umurii | የመጨረሻ የወር አበባ የታየበት ወር እና ዓ.ም.<br>Guyyaa dhumaa adafiin itti mul'ate yoomi? | አሁን የሰንት ወር ነፍስ ጡር ነሽ<br>Amma ulfa ji'a meeqati | *እርግዝናዊ ወጤት<br>* Bu'aa ulfichaa | አስተያየት<br>ላል<br>Yaada (yoojiraate) |
|-------------|----------------------------------------------------------------------------------------|--------------------------------------------------------------------------|---------------|-----------------------------------------------------------------------------|-------------------------------------------------|---------------------------------|------------------------------------|
| (U 01)      | (U 02)                                                                                 | (U 03)                                                                   | (U 04)        | (U 05)                                                                      | (U 06)                                          | (U 07)                          | (U 08)                             |
| 01          |                                                                                        |                                                                          |               | -- / -----                                                                  |                                                 |                                 |                                    |
| 02          |                                                                                        |                                                                          |               | -- / -----                                                                  |                                                 |                                 |                                    |
| 03          |                                                                                        |                                                                          |               | -- / -----                                                                  |                                                 |                                 |                                    |
| 04          |                                                                                        |                                                                          |               | -- / -----                                                                  |                                                 |                                 |                                    |
| 05          |                                                                                        |                                                                          |               | -- / -----                                                                  |                                                 |                                 |                                    |
| 06          |                                                                                        |                                                                          |               | -- / -----                                                                  |                                                 |                                 |                                    |
| 07          |                                                                                        |                                                                          |               | -- / -----                                                                  |                                                 |                                 |                                    |
| 08          |                                                                                        |                                                                          |               | -- / -----                                                                  |                                                 |                                 |                                    |
| 09          |                                                                                        |                                                                          |               | -- / -----                                                                  |                                                 |                                 |                                    |
| 10          |                                                                                        |                                                                          |               | -- / -----                                                                  |                                                 |                                 |                                    |
| 11          |                                                                                        |                                                                          |               | -- / -----                                                                  |                                                 |                                 |                                    |
| 12          |                                                                                        |                                                                          |               | -- / -----                                                                  |                                                 |                                 |                                    |
| 13          |                                                                                        |                                                                          |               | -- / -----                                                                  |                                                 |                                 |                                    |

\*  እርግዝናዊ ወጤት 1. እርግዝናዊ የተቋረጠ(Abortion) 2. የጨነገፈ (Miscarriage) 3. ሞተዉ የተወለዱ (Stillbirth) ከሆነ ይገለጽ::

\* Bu'aa ulfichaa 1. Ulfichi kan addaan cite 2. Kan irraa ba'e 3. Du'anii kan dhalatan yoota'e ibsi.

**Real Time MORTALITY MONITORING  
MONTHLY HEW RECORDING OF VITAL EVENTS DATA COLLECTION  
FORM  
JOHNS HOPKINS UNIVERSITY – MIZ HASAB RESERCH CENTER**

መረጃ መሰብሰቢያ ቅጽ

Guca odeeffannoon ittiin sasaabamu

|                       |           |                         |
|-----------------------|-----------|-------------------------|
| ዞን .....              | ወረዳ ..... | የቀበሌዊ ስም .....          |
| Godina                | Aanaa     | Maqaa gandaa            |
| የጤና ተቋም ስም .....      |           | የጤና ተቋም መለያ ቁጥር .....   |
| Maqaa dhaabata fayyaa |           | Koodii dhaabbata fayyaa |
| የጤና ኤክስቴንሽን ሠ. ስም     | 1. ....   | ወር እና ዓ.ም. ....         |
| Maqaa hojjetu         | 2. ....   | Ji'aa fii bara          |
| ekisteenshinii fayyaa |           |                         |

ክፍል ለ: ስለ ወልደቶች (በሀይወት የተወለዱትን ብቻ ይመዘገብ)

Kutaa B: Waa'ee dhalootaa (Lubbuu dhaan kan dhalatan qofa galmeessi)

| ተ.ቁ<br>Lakk | የህጻኑ እናት የቤተሰብ መለያ ቁ. ከቤተሰብ ማህደር<br>Galmees maatii irraa Lakk. Haadha mucaa | የህጻኑ እናት መለያ ቁጥር ከቤተሰብ ማህደር<br>Lakk. Haadha mucaa galmees maatii irraa | የህጻኑ ጾታ<br>Saala mucaa | የተወለደበት ቀን ወር እና ዓ.ም.<br>Guyyaa fii ji'a dhalate | የተወለደበት ቦታ<br>ቤት/ያለልምድ አዋላጅ = 1<br>ቤት/በልምድ አዋላጅ = 2<br>ጤና ጣቢያ/ኬላ = 3<br>ሆስፒታል = 4<br>ሌላ ይገለጽ<br>Bakka dhalootaa<br>-Mana/Deesiftuu addaa malee = 1<br>-Mana/ dessiftuu aadaa tiin = 2<br>- Bu. Fayyaa/Kella = 3<br>-Hoospitaala = 4<br>-Kan birraa ibsi | አስተያየት ካለ<br>Yaada (yoo jiraate) |
|-------------|-----------------------------------------------------------------------------|------------------------------------------------------------------------|------------------------|--------------------------------------------------|---------------------------------------------------------------------------------------------------------------------------------------------------------------------------------------------------------------------------------------------------------|----------------------------------|
| (ለ 01)      | (ለ 02)                                                                      | (ለ 03)                                                                 | (ለ 04)                 | (ለ 05)                                           | (ለ 06)                                                                                                                                                                                                                                                  | (ለ 07)                           |
| 01          |                                                                             |                                                                        | ወ Dhi.<br>ሴ Dha.       | -- / -- / ----                                   |                                                                                                                                                                                                                                                         |                                  |

**Real Time MORTALITY MONITORING  
MONTHLY HEW RECORDING OF VITAL EVENTS EXTRACTION FORM  
JOHNS HOPKINS UNIVERSITY – MIZ HASAB RESERCH CENTER**

መረጃዎች ሁሉ መሰብሰቢያ ቅጽ  
Guca odeeffannoon ittiin sasaabamu

|                       |           |                         |
|-----------------------|-----------|-------------------------|
| ዘን .....              | ወረዳ ..... | የቀበሌው ስም .....          |
| Godina                | Aanaa     | Maqaa gandaa            |
| የጤና ተቋሙ ስም .....      |           | የጤና ተቋሙ መለያ ቁጥር .....   |
| Maqaa dhaabata fayyaa |           | Koodii dhaabbata fayyaa |
| የጤና ኤክስፐርት ሠ. ስም      | 1. ....   | ወር እና ዓ.ም. ....         |
| Maqaa hojjetuu        | 2. ....   | Ji'aa fii bara          |
| ekisteenshinii fayyaa |           |                         |

**ክፍል ለ: ስለ ዉልደት (በህይወት የተወለዱትን ብቻ ይመዘገብ)**

**Kutaa B: Waa'ee dhalootaa (Lubbuu dhaan kan dhalatan qofa galmeessi)**

| ተ.ቁ<br>Lakk | የህጻኑ እናት የቤተሰብ መለያ ቁ. ከቤተሰብ ማህደር<br>Galmee maatii irraa Lakk. Haadha mucaa | የህጻኑ እናት መለያ ቁጥር ከቤተሰብ ማህደር<br>Lakk. Haadha mucaa galmee maatii irraa | የህጻኑ ጾታ<br>Saala mucaa | የተወለደበት ቀን ወር እና ዓ.ም.<br>Guyyaa fii ji'a dhalate | የተወለደበት ቦታ ቤት/ያለልምድ አዋላጅ = 1<br>ቤት/በልምድ አዋላጅ = 2<br>ጤና ጣቢያ/ኬላ = 3<br>ሆስፒታል = 4<br>ሌላ ይገለጽ<br>Bakka dhalootaa<br>-Mana/Deesiftuu addaa malee =1<br>-Mana/ dessiftuu aadaa tiin = 2<br>- Bu. Fayyaa/Kella =3<br>-Hoospitaala = 4<br>-Kan birraa ibsi | አስተያየት ካለ<br>Yaada (yoo jiraate) |
|-------------|----------------------------------------------------------------------------|-----------------------------------------------------------------------|------------------------|--------------------------------------------------|----------------------------------------------------------------------------------------------------------------------------------------------------------------------------------------------------------------------------------------------------|----------------------------------|
| (ለ 01)      | (ለ 02)                                                                     | (ለ 03)                                                                | (ለ 04)                 | (ለ 05)                                           | (ለ 06)                                                                                                                                                                                                                                             | (ለ 07)                           |
| 01          |                                                                            |                                                                       | ወ Dhi.<br>ሴ Dha.       | -- / -- / ----                                   |                                                                                                                                                                                                                                                    |                                  |
| 02          |                                                                            |                                                                       | ወ Dhi.<br>ሴ Dha.       | -- / -- / ----                                   |                                                                                                                                                                                                                                                    |                                  |
| 03          |                                                                            |                                                                       | ወ Dhi.<br>ሴ Dha.       | -- / -- / ----                                   |                                                                                                                                                                                                                                                    |                                  |
| 04          |                                                                            |                                                                       | ወ Dhi.<br>ሴ Dha.       | -- / -- / ----                                   |                                                                                                                                                                                                                                                    |                                  |
| 05          |                                                                            |                                                                       | ወ Dhi.<br>ሴ Dha.       | -- / -- / ----                                   |                                                                                                                                                                                                                                                    |                                  |



**Real Time MORTALITY MONITORING  
MONTHLY HEW RECORDING OF VITAL EVENTS DATA COLLECTION FORM**

JOHNS HOPKINS UNIVERSITY – MIZ HASAB RESERCH CENTER

መረጃ መሰብሰቢያ ቅጽ

Guca odeeffannoon ittiin sasaabamu

|                       |           |                         |
|-----------------------|-----------|-------------------------|
| ዞን .....              | ወረዳ ..... | የቀበሌው ስም .....          |
| Godina                | Aanaa     | Maqaa gandaa            |
| የጤና ተቋም ስም .....      |           | የጤና ተቋም መለያ ቁጥር .....   |
| Maqaa dhaabata fayyaa |           | Koodii dhaabbata fayyaa |
| የጤና ኤክስቴንሽን ሠ. ስም     | 1. ....   | ወር እና ዓ.ም. ....         |
| Maqaa hojjetu         | 2. ....   | Ji'aa fii bara          |
| ekisteenshinii fayyaa |           |                         |

ክፍል ሐ : ሀልፊት (ሞት) Kutaa C: Ergarama (Du'a)

| ተ.ቁ<br>lakk | የሞተው ሰው የቤተሰብ መለያ ቁጥር ከቤተሰብ ማህደር Koodii maatii nama dwee galmmee maatii keessaa | *የሞተው ሰው መለያ ቁጥር ከቤተሰብ ማህደር *Koodii nama du'ee galmee maatii keessaa | የተወለደበት ቀን ቀን/ወር/ዓ.ም Guyyaa dhalota guyyaa/Ji'a. Bara | ያታ Saala         | የሞተበት ቀን ቀን/ወር/ዓ.ም Guyyaa du'e Guyyaa/Ji'a/Bara | **ዕድሜ Umurii | የሞተበት ቦታ (ጤና ተቋም ውስጥ ከሆነ ስሙ ይጠቀስ) Bakka itti du'e (dhaa bbata fayyaa yoo ta'e maqaan haa ibsamu) | የተመዘገበው የአሟሟቱ ምክንያት Du'aaf sababa kan ta'ee galmaa'ee | ማስታዎሽ:- የሞተው እድሜው 12 እና ከዚያ በላይ የሆኑት ሴት ከሆነች የሚከተለውን ጠይቅ Yaadaanoo: kan du;e umuriin issa 12 fii isaa ol dubartii taate yoo ta'e kanatti fufee kan jiru gaafadhu | ስትሞት እርጉዝ ነበረች? Yeroo duutu ulfa turtee? አዎ 1 EEye የለም 2 Lakki | የሞተችው በወሊድ ምክንያት ነው? Kan duute Sababa ulfaatiinii? አዎ 1 EEye የለም 2 Lakki | የሞተችው በወለደች በ 2 ወር ውስጥ ነው? Kanduute eega deessee jj'a 2 keessat dhaa? አዎ 1 EEye የለም 2 Lakki |
|-------------|---------------------------------------------------------------------------------|----------------------------------------------------------------------|-------------------------------------------------------|------------------|-------------------------------------------------|--------------|--------------------------------------------------------------------------------------------------|-------------------------------------------------------|------------------------------------------------------------------------------------------------------------------------------------------------------------------|----------------------------------------------------------------|--------------------------------------------------------------------------|---------------------------------------------------------------------------------------------|
| (ሐ 01)      | (ሐ 02)                                                                          | (ሐ 03)                                                               | (ሐ 04)                                                | (ሐ 05)           | (ሐ 06)                                          | (ሐ 07)       | (ሐ 08)                                                                                           | (ሐ 09)                                                | (ሐ 10)                                                                                                                                                           | (ሐ 11)                                                         | (ሐ 12)                                                                   |                                                                                             |
| 01          |                                                                                 |                                                                      | -- / -- / -- --                                       | ወ Dhi.<br>ሴ Dha. | -- / -- / -- --                                 |              |                                                                                                  |                                                       |                                                                                                                                                                  |                                                                |                                                                          |                                                                                             |

\*\* የሞተው ሰው እድሜው ከ 1 ወር በታች ከሆነ ዕድሜው በቀን ይገለጻል፤ ዕድሜው ከ 2 ዓመት በታች ከሆነ በወራት ይገለጻል፤ እስከ 12 ዓመት ድረስ በቀን ይገለጻል፤ ጎን ቀን ወይም ወር ስለሆነ መግለጫውን አይዘገቡም።  
\*\* Umuriin Issa du'ee ji'a 1 gad yoo ta'e, guyyaadhaan haa ibsamu; ji'a 2 gad yoo ta'e ji'aan haa ibsamu; Adaraa keessan lakkofsicha bukkeet guyyaa Ykn ji'a jettanii barreessuu hin dagatiinaa  
\* ተወልደው ላይቆይ ለሞቱ ህጻናት የ እናት የሞት መለያ ቁጥር ተጠቅሙ።  
\* Daa;imman dhalatanii osoo hin turriin du'aniif koodii haadhaatti fayyadamaa.

**Real Time MORTALITY MONITORING  
MONTHLY HEW RECORDING OF VITAL  
EVENTS EXTRACTION FORM  
JOHNS HOPKINS UNIVERSITY – MIZ HASAB  
RESERCH CENTER**

መረጃዎች ሁሉ መሰብሰቢያ ቅጽ Guca odeeffannoon ittiin sasaabamu

|                             |                               |                      |
|-----------------------------|-------------------------------|----------------------|
| ዞን .....                    | ወረዳ .....                     | የቀበሌዊ ስም .....       |
| Godina .....                | Aanaa .....                   | Maqaa gandaa .....   |
| የጤና ተቋም ስም .....            | የጤና ተቋም መለያ ቁጥር .....         |                      |
| Maqaa dhaabata fayyaa ..... | Koodii dhaabbata fayyaa ..... |                      |
| የጤና ኤክስቴንሽን ሠ. ስም 1. ....   | 2. ....                       | ወር እና ዓ.ም. ....      |
| Maqaa hojjettu .....        | ekisteenshinii fayyaa .....   | Ji'aa fii bara ..... |

**ክፍል ሐ : ህልራቶች (ሞት) Kutaa C: Ergarama (Du'a)**

| ተ.ቁ<br>lakk | የሞተው ሰው የቤተሰብ መለያ ቁጥር ከቤተሰብ ማህደር Koodii maatii nama dwee galmmee maatii keessaa | *የሞተው ሰው መለያ ቁጥር ከቤተሰብ ማህደር *Koodii nama du'ee galmeem maatii keessaa | የተወለደበት ቀን ቀን/ወር/ዓ.ም<br>Guyyaa dhalota guyyaa/Ji'a. Bara | ፆታ<br>Saala      | የሞተበት ቀን ቀን/ወር/ዓ.ም<br>Guyyaa du'e Guyyaa/Ji'a/Bara | **ዕድሜ<br>Umurii | የሞተበት ቦታ (ጤና ተቋም ውስጥ ከሆነ ስሙ ይጠቀስ)<br>Bakka itti du'e (dhaa bbata fayyaa yoo ta'e maqaan haa ibsamu) | የአሟሟቱ ምክንያት<br>Du'aaf sababa kan ta'ee | ማስታዎሽ:- የሞተው እድሜው 12 እና ከዚያ በላይ የሆኑት ሴት ከሆነች የሚከተለውን ጠይቅ ጠይቅ ጠይቅ<br>Yaadaanoo: kan du;e umuriin issa 12 fii isaa ol dubartii taate yoo ta'e kanatti fufee kan jiru gaafadhu |        |        |
|-------------|---------------------------------------------------------------------------------|-----------------------------------------------------------------------|----------------------------------------------------------|------------------|----------------------------------------------------|-----------------|-----------------------------------------------------------------------------------------------------|----------------------------------------|-----------------------------------------------------------------------------------------------------------------------------------------------------------------------------|--------|--------|
| (ሐ 01)      | (ሐ 02)                                                                          | (ሐ 03)                                                                | (ሐ 04)                                                   | (ሐ 05)           | (ሐ 06)                                             | (ሐ 07)          | (ሐ 08)                                                                                              | (ሐ 09)                                 | (ሐ 10)                                                                                                                                                                      | (ሐ 11) | (ሐ 12) |
| 01          |                                                                                 |                                                                       | __ / __ / ____                                           | ወ Dhi.<br>ሴ Dha. | __ / __ / ____                                     |                 |                                                                                                     |                                        |                                                                                                                                                                             |        |        |
| 02          |                                                                                 |                                                                       | __ / __ / ____                                           | ወ Dhi.<br>ሴ Dha. | __ / __ / ____                                     |                 |                                                                                                     |                                        |                                                                                                                                                                             |        |        |
| 04          |                                                                                 |                                                                       | __ / __ / ____                                           | ወ Dhi.<br>ሴ Dha. | __ / __ / ____                                     |                 |                                                                                                     |                                        |                                                                                                                                                                             |        |        |
| 05          |                                                                                 |                                                                       | __ / __ / ____                                           | ወ Dhi.<br>ሴ Dha. | __ / __ / ____                                     |                 |                                                                                                     |                                        |                                                                                                                                                                             |        |        |
| 06          |                                                                                 |                                                                       | __ / __ / ____                                           | ወ Dhi.<br>ሴ Dha. | __ / __ / ____                                     |                 |                                                                                                     |                                        |                                                                                                                                                                             |        |        |
| 07          |                                                                                 |                                                                       | __ / __ / ____                                           | ወ Dhi.<br>ሴ Dha. | __ / __ / ____                                     |                 |                                                                                                     |                                        |                                                                                                                                                                             |        |        |

\*\* የሞተው ሰው እድሜው ከ 1 ወር በታች ከሆነ ዕድሜው በቀን ይገለጻል፤ ዕድሜው ከ 2 ዓመት በታች ከሆነ በወራት ይገለጻል፤ እሳቱን በቁጥር ገን ቀን ወይም ወር ብለው መጻፍምን አይዘገቡ።  
\* Umuriin Isa du'ee ji'a 1 gad yoo ta'e, guyyaadhaan haa ibsamu; ji'a 2 gad yoo ta'e ji'aan haa ibsamu; Adaraa keessan lakkofsicha bukkeet guyyaa Ykn ji'a jettanii barreessuu hin dagatiinaa.  
\* ተወልደዉ ሳይቆይ ለሞቱ ህጻናት የ እናት የሞት መለያ ቁጥር ተጠቀሙ።  
\* Daa;imman dhalatani osoo hin turii du'aniif koodii haadhaatti fayyadamaa.

ተረጋግጧል: የሱፐርቫይዘር ስም: ..... ፊርማ ..... ቀን .....

Mirkaneefameera: Maqaa suparvayzarichaa: \_\_\_\_\_ Mallattoo \_\_\_\_\_ Guyyaa \_\_\_\_\_
